# Supplementary material
Source: PubMed Central journal article supplement (PMC7187680)
Supplement: NIHMS1573863-supplement-SI.pdf [file NIHMS1573863-supplement-SI.pdf]

## Supporting information

### Triazole-Based Inhibitors of the Wnt/ $\beta$ -Catenin Signaling Pathway Improves Glucose and Lipid Metabolism in Diet-Induced Obese Mice

Obinna N. Obianom,<sup>#,1</sup> Yong Ai,<sup>#,1</sup> Yingjun Li,<sup>1</sup> Wei Yang,<sup>#,1</sup> Dong Guo,<sup>1</sup> Hong Yang,<sup>1</sup>  
Srilatha Sakamuru,<sup>2</sup> Menghang Xia,<sup>2</sup> Fengtian Xue<sup>\*,1</sup> and Yan Shu<sup>\*,1,3</sup>

<sup>1</sup>Department of Pharmaceutical Sciences, University of Maryland School of Pharmacy,  
Baltimore, Maryland 21201, USA

<sup>2</sup>National Center for Advancing Translational Sciences, National Institutes of Health,  
Bethesda, MD 20892-3375, USA

<sup>3</sup>School and Hospital of Stomatology, Guangzhou Medical University, Guangzhou  
510140, China

#### Contents:

|                                                                     |        |
|---------------------------------------------------------------------|--------|
| 1. Figure S1.....                                                   | S2     |
| 2. Figure S2.....                                                   | S3     |
| 3. Figure S3.....                                                   | S4     |
| 4. Figure S4.....                                                   | S5     |
| 5. Figure S5.....                                                   | S6     |
| 6. Table S1.....                                                    | S7     |
| 7. Table S2.....                                                    | S8-13  |
| 8. Table S3.....                                                    | S14    |
| 9. <sup>1</sup> H, <sup>13</sup> C NMR spectra. Figures S6-S47..... | S15-56 |

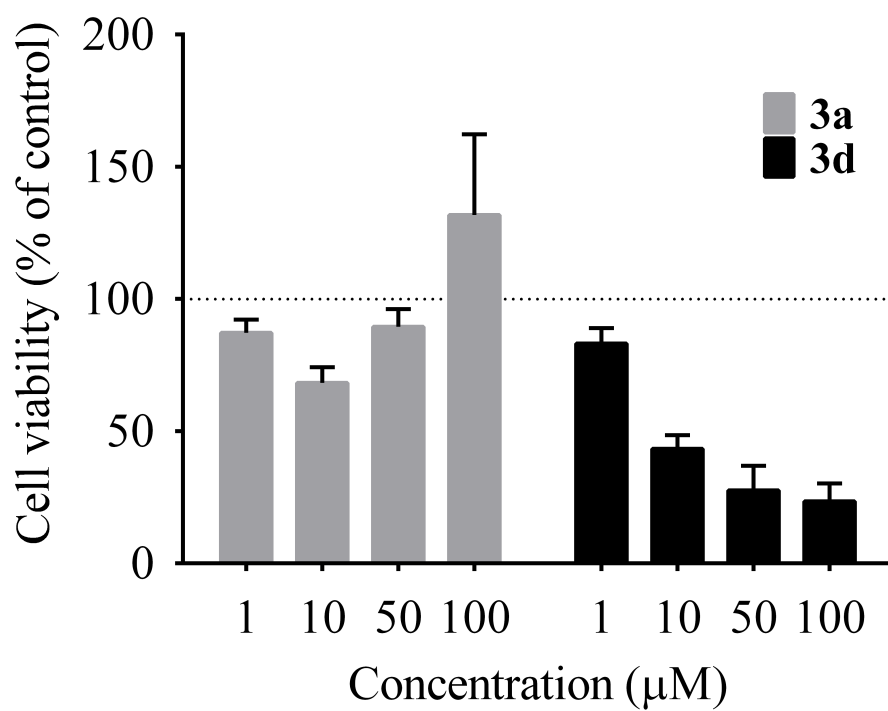

**Figure S1.** Cytotoxicity of compound **3a** and **3d** in unstimulated HEK293 cells with low background of Wnt pathway activity. Cells were incubated with the compounds for 72 hours. Data are reported as mean  $\pm$  SD from quadruplicates.

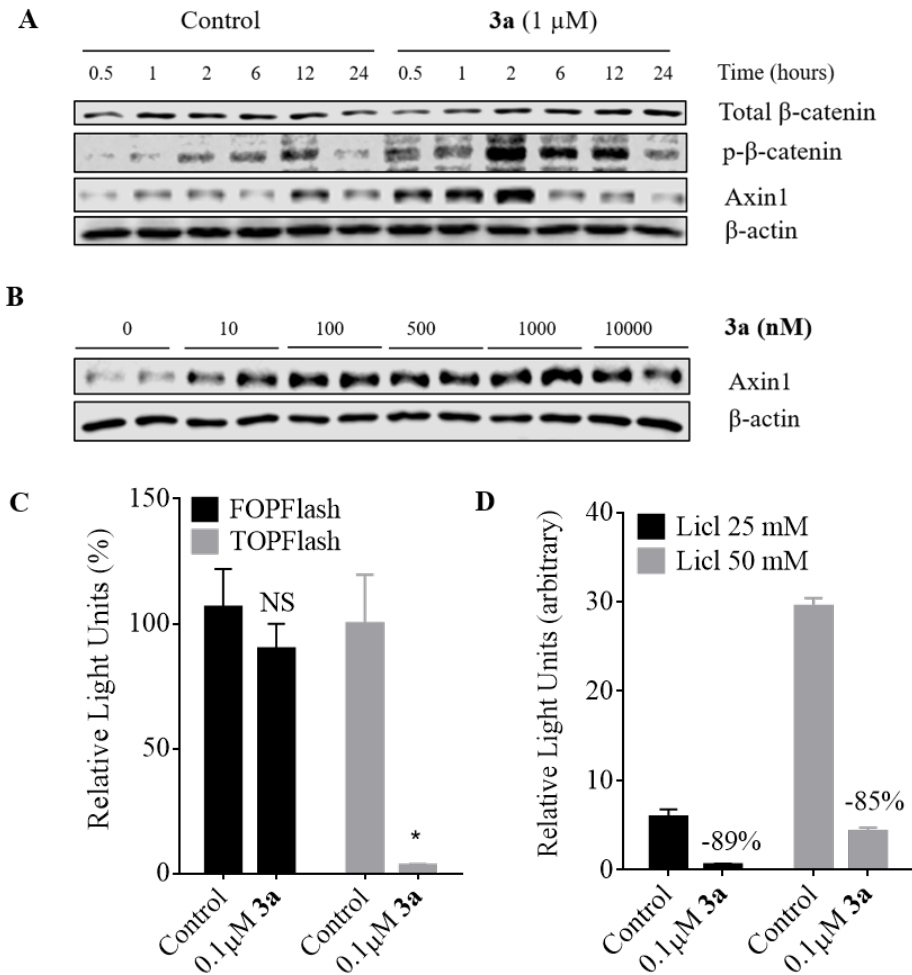

**Figure S2.** Time and concentration dependent regulation by compound **3a** on the Wnt/ $\beta$ -catenin pathway. (A) Time dependent effect of compound **3a** on cytoplasmic levels of Wnt/ $\beta$ -catenin pathway proteins in the presence of Wnt3a. (B) Concentration dependent effect of compound **3a** in the Wnt/ $\beta$ -catenin pathway in HEK293 cells treated for 2 h. (C) Reporter assay of compound **3a** in cells overexpressing TCF/LEF response elements (TOPFlash) or scrambled non-function TCF/LEF response element (FOPFlash) treated with Wnt3a-conditioned medium. (D) Varying concentrations of LiCl effect on the efficacy of compound **3a**. Data are presented as mean  $\pm$  standard deviation,  $n=3$ . \* $p < 0.05$ . NS, not significant.

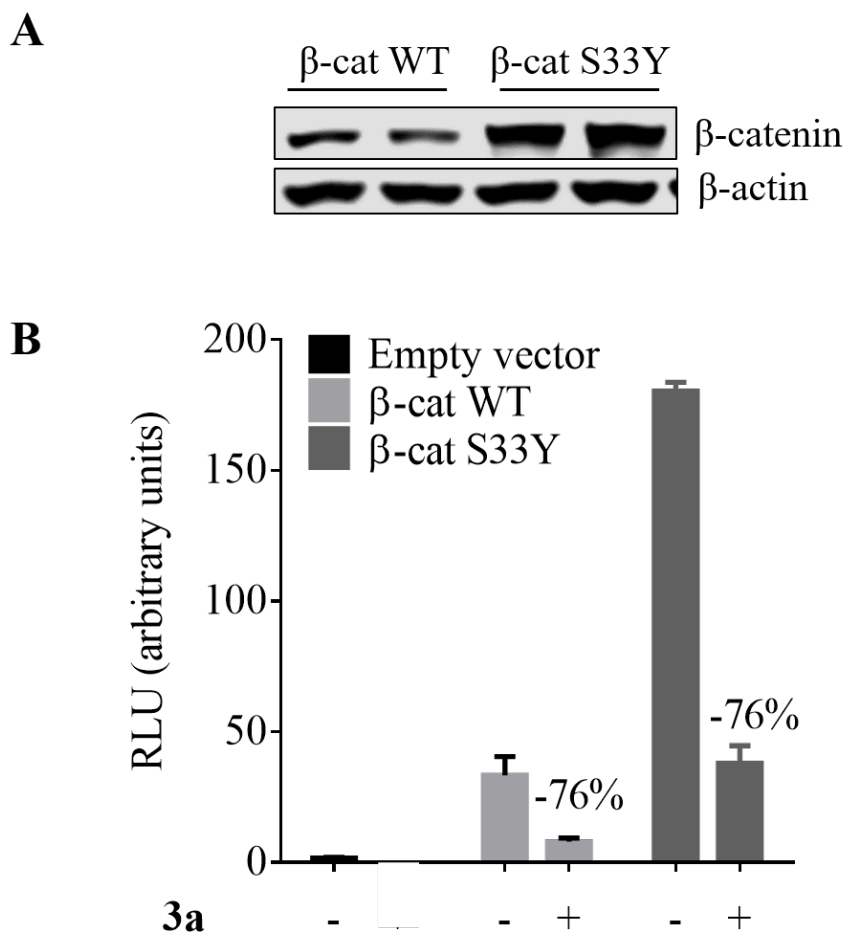

**Figure S3.** Inhibition of Wnt signaling activity by compound **3a** in HEK293 cells overexpressing  $\beta$ -catenin. (A) Western blot analysis of  $\beta$ -catenin protein expression in cells transiently overexpressing wild type and S33Y-mutant (*GSK3 $\beta$*  phosphorylation site)  $\beta$ -catenin. The cells were transfected with 500 ng of the plasmids and harvested 48 hours later. (B) TCF/LEF gene reporter assay of the transfected cells treated with compound **3a**. Cells were co-transfected with both the indicated  $\beta$ -catenin plasmids and the TOPflash reporter constructs. After 48 hours, cells were treated with 100 nM of compound **3a** for 24 hours. Data are presented as mean  $\pm$  SD, n=3.

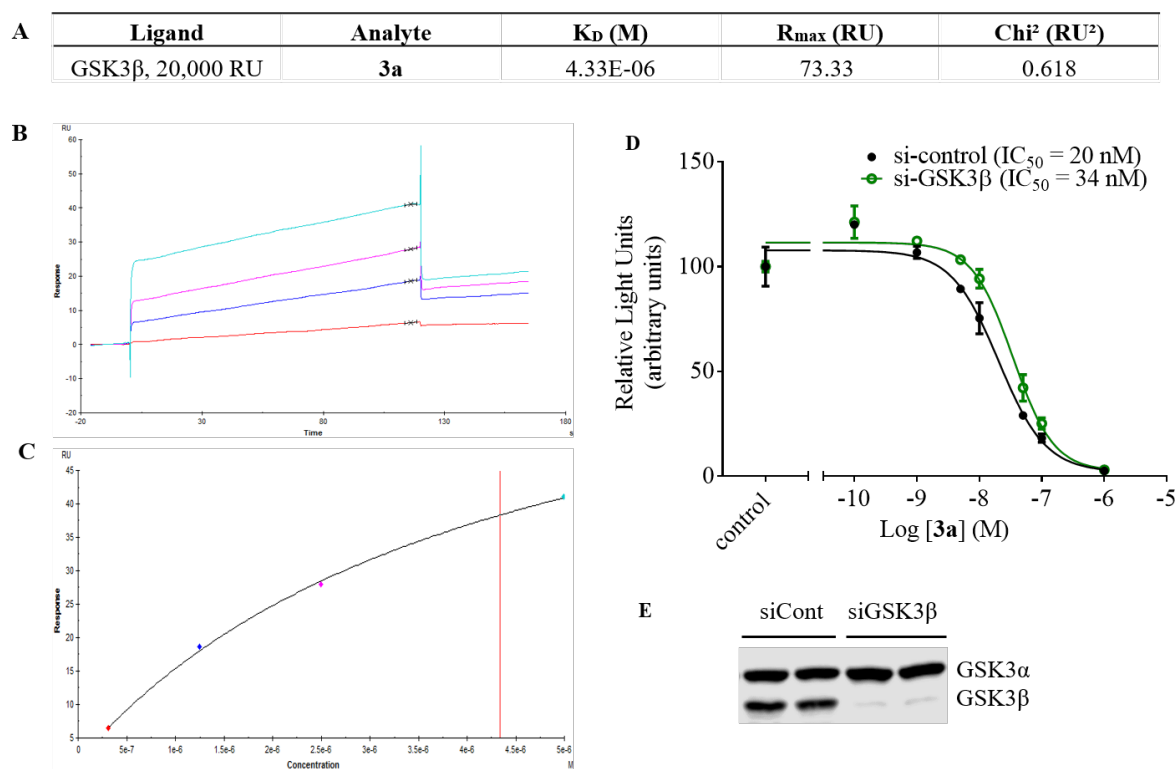

**Figure S4.** Direct but weak binding of compound **3a** to GSK3 $\beta$ . (A) SPR analysis of **3a** binding to recombinant GSK3 $\beta$  protein. (B) & (C) Concentration dependent binding of **3a** to GSK3 $\beta$ . The concentrations used were 0.313 (red), 1.25 (navy blue), 2.50 (pink) and 5.00  $\mu$ M (cyan). (D) Inhibition of Wnt activity by compound **3a** in the presence and absence of GSK3 $\beta$  knockdown, as determined by the luciferase reporter assay. (E) Knockdown of GSK3 $\beta$  in HEK293 cells by a small interference RNA.

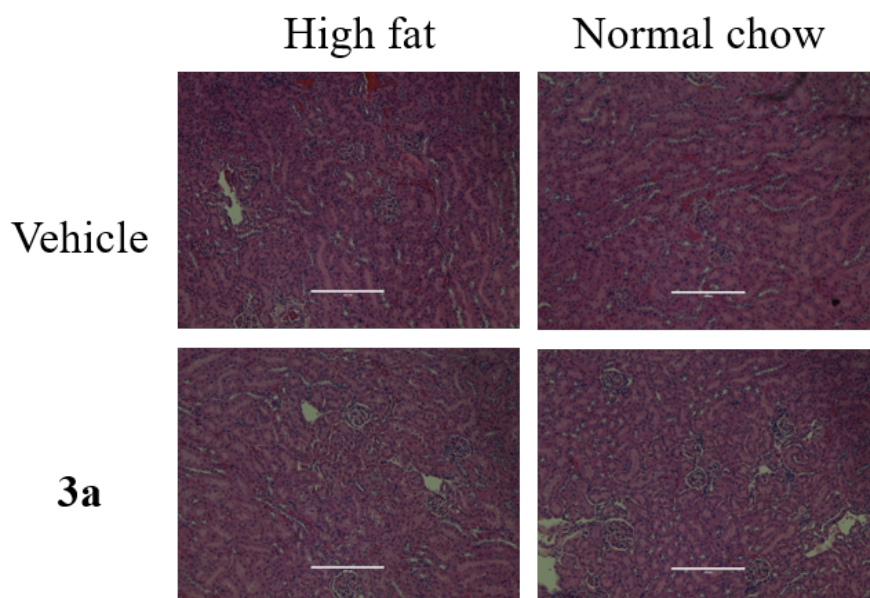

**Figure S5.** Compound **3a** treatment has no noticeable toxic effects on mouse kidney histology. The mice fed on either a high fat diet or a normal chow diet received *i.p.* injection of 40 mg/kg **3a** or vehicle (corn oil) every two days for 11 weeks. The isolated kidney tissues were staining by Haematoxylin and Eosin (H&E). The images were taken under an amplification of 20 X.

**Table S1.** Human primers used in the experiments

| <b>Gene</b> | <b>Forward</b>         | <b>Reverse</b>          |
|-------------|------------------------|-------------------------|
| AXIN2       | GAGTGGACTTGTGCCGACTTCA | GGTGGCTGGTGCAAAGACATAG  |
| CYCD1       | CAATGACCCCGCACGATTTC   | CATGGAGGGCGGATTGGAA     |
| PEPCK       | GTCAGCCTGATCACATCCACA  | CCGTCTTGCTTTCGATCCTG    |
| G6PASE      | CTACTACAGCAACACTTCCGTG | GGTCGGCTTTATCTTTCCCTGA  |
| ACAT2       | GCGGACCATCATAGGTTCCCTT | ACTGGCTTGTCTAACAGGATTCT |
| ACOT4       | CCCAGGTAAAAGGCCCAGG    | GTGTTCCCCTGATCCCAGAT    |
| SCD1        | GCCCCTCTACTTGGAAGACGA  | AAGTGATCCCATACAGGGCTC   |
| ACAA1       | GCGGTTCTCAAGGACGTGAAT  | GTCTCCGGGATGTCACTCAGA   |
| FASN        | CCGAGACACTCGTGGGCTA    | CTTCAGCAGGACATTGATGCC   |

**Table S2.** The effect of compounds **3a-3u** on HEK293 cell viability during the incubation (24 hours) of the reporter assay for measuring Wnt signaling activity.

| Cmpd      | Growth curve                                                                        | IC <sub>50</sub> of growth inhibition (μM) |
|-----------|-------------------------------------------------------------------------------------|--------------------------------------------|
| <b>3a</b> | 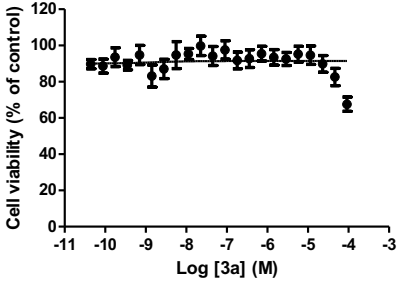   | > 92                                       |
| <b>3b</b> |   | > 92                                       |
| <b>3c</b> |  | > 92                                       |
| <b>3d</b> |  | > 92                                       |



|    |                                                                                     |      |
|----|-------------------------------------------------------------------------------------|------|
| 3e | 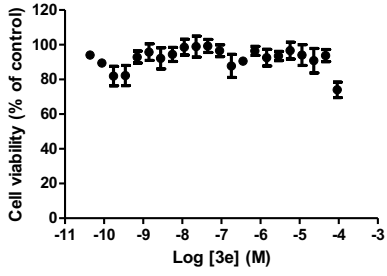   | > 92 |
| 3f |    | > 92 |
| 3g |   | > 92 |
| 3h |  | > 92 |

|    |                                                                                                                                              |      |
|----|----------------------------------------------------------------------------------------------------------------------------------------------|------|
| 3i | 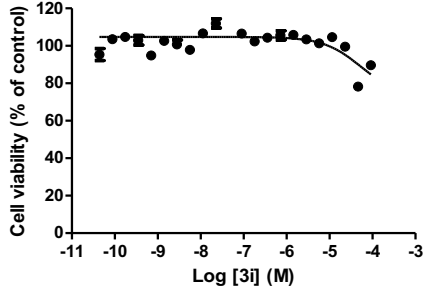 <p>Cell viability (% of control)</p> <p>Log [3i] (M)</p>   | > 92 |
| 3j |  <p>Cell viability (% of control)</p> <p>Log [3j] (M)</p>   | > 92 |
| 3k |  <p>Cell viability (% of control)</p> <p>Log [3k] (M)</p>  | > 92 |
| 3l |  <p>Cell viability (% of control)</p> <p>Log [3l] (M)</p> | > 92 |

|    |                                                                                     |      |
|----|-------------------------------------------------------------------------------------|------|
| 3m | 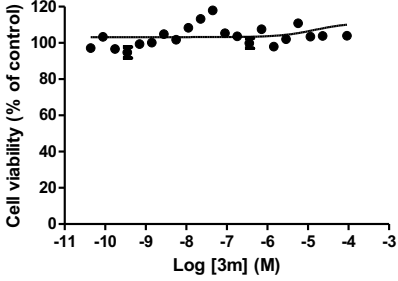   | > 92 |
| 3n |    | > 92 |
| 3o |   | > 92 |
| 3p |  | > 92 |

|    |                                                                                                                                              |      |
|----|----------------------------------------------------------------------------------------------------------------------------------------------|------|
| 3q | 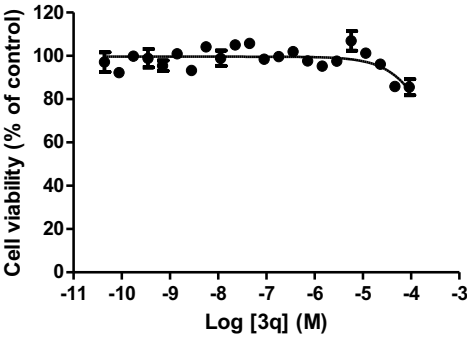 <p>Cell viability (% of control)</p> <p>Log [3q] (M)</p>   | > 92 |
| 3r |  <p>Cell viability (% of control)</p> <p>Log [3r] (M)</p>  | > 92 |
| 3s |  <p>Cell viability (% of control)</p> <p>Log [3s] (M)</p> | > 92 |
| 3t |  <p>Cell viability (% of control)</p> <p>Log [3t] (M)</p> | > 92 |

| <b>3u</b>    | 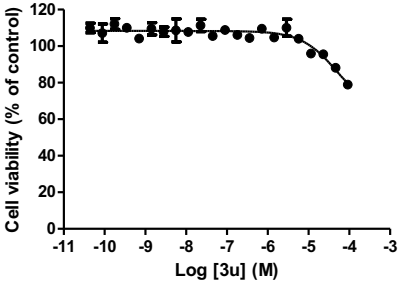 <p>The graph displays the cell viability of a control group (100%) in response to increasing concentrations of 3u. The x-axis represents the logarithm of the concentration of 3u in Molar (M), ranging from -11 to -3. The y-axis represents the cell viability as a percentage of the control, ranging from 0 to 120. The data points show that cell viability remains near 100% for concentrations up to approximately 10<sup>-6</sup> M, after which it begins to decrease, reaching about 80% viability at 10<sup>-4</sup> M.</p> <table border="1"><thead><tr><th>Log [3u] (M)</th><th>Cell viability (% of control)</th></tr></thead><tbody><tr><td>-10</td><td>105</td></tr><tr><td>-9</td><td>105</td></tr><tr><td>-8</td><td>105</td></tr><tr><td>-7</td><td>105</td></tr><tr><td>-6</td><td>105</td></tr><tr><td>-5</td><td>105</td></tr><tr><td>-4</td><td>80</td></tr></tbody></table> | Log [3u] (M) | Cell viability (% of control) | -10 | 105 | -9 | 105 | -8 | 105 | -7 | 105 | -6 | 105 | -5 | 105 | -4 | 80 | > 92 |
|--------------|---------------------------------------------------------------------------------------------------------------------------------------------------------------------------------------------------------------------------------------------------------------------------------------------------------------------------------------------------------------------------------------------------------------------------------------------------------------------------------------------------------------------------------------------------------------------------------------------------------------------------------------------------------------------------------------------------------------------------------------------------------------------------------------------------------------------------------------------------------------------------------------------------------------------------------------------------------------------------------------|--------------|-------------------------------|-----|-----|----|-----|----|-----|----|-----|----|-----|----|-----|----|----|------|
| Log [3u] (M) | Cell viability (% of control)                                                                                                                                                                                                                                                                                                                                                                                                                                                                                                                                                                                                                                                                                                                                                                                                                                                                                                                                                         |              |                               |     |     |    |     |    |     |    |     |    |     |    |     |    |    |      |
| -10          | 105                                                                                                                                                                                                                                                                                                                                                                                                                                                                                                                                                                                                                                                                                                                                                                                                                                                                                                                                                                                   |              |                               |     |     |    |     |    |     |    |     |    |     |    |     |    |    |      |
| -9           | 105                                                                                                                                                                                                                                                                                                                                                                                                                                                                                                                                                                                                                                                                                                                                                                                                                                                                                                                                                                                   |              |                               |     |     |    |     |    |     |    |     |    |     |    |     |    |    |      |
| -8           | 105                                                                                                                                                                                                                                                                                                                                                                                                                                                                                                                                                                                                                                                                                                                                                                                                                                                                                                                                                                                   |              |                               |     |     |    |     |    |     |    |     |    |     |    |     |    |    |      |
| -7           | 105                                                                                                                                                                                                                                                                                                                                                                                                                                                                                                                                                                                                                                                                                                                                                                                                                                                                                                                                                                                   |              |                               |     |     |    |     |    |     |    |     |    |     |    |     |    |    |      |
| -6           | 105                                                                                                                                                                                                                                                                                                                                                                                                                                                                                                                                                                                                                                                                                                                                                                                                                                                                                                                                                                                   |              |                               |     |     |    |     |    |     |    |     |    |     |    |     |    |    |      |
| -5           | 105                                                                                                                                                                                                                                                                                                                                                                                                                                                                                                                                                                                                                                                                                                                                                                                                                                                                                                                                                                                   |              |                               |     |     |    |     |    |     |    |     |    |     |    |     |    |    |      |
| -4           | 80                                                                                                                                                                                                                                                                                                                                                                                                                                                                                                                                                                                                                                                                                                                                                                                                                                                                                                                                                                                    |              |                               |     |     |    |     |    |     |    |     |    |     |    |     |    |    |      |

**Table S3.** Pharmacokinetic and physicochemical parameters of compound **3a** in mice.

| Parameter            | Units          | Route      |                   |
|----------------------|----------------|------------|-------------------|
|                      |                | Oral (N=5) | Intravenous (N=4) |
| Dose                 | mg/kg          | 10         | 10                |
| T <sub>1/2</sub>     | h              | 3.3 ± 0.83 | 2.8 ± 0.51        |
| C <sub>max</sub>     | µg/mL          | 2.2 ± 0.49 |                   |
| T <sub>max</sub>     | h              | 0.25       |                   |
| AUC <sub>0-inf</sub> | h*µg/mL        | 4.5 ± 0.76 | 21 ± 2.1          |
| Bioavailability      | %              | 21         |                   |
| LogP <sup>a</sup>    |                | 3.30       |                   |
| PSA <sup>a</sup>     | Å <sup>2</sup> | 72.7       |                   |
| pKa <sup>a</sup>     |                | 5.93       |                   |

<sup>a</sup> The values were calculated using the ACD/Labs version 12.02 software.

Pharmacokinetic parameters were calculated using non-compartmental analysis function with a logarithmic trapezoidal method in Phoenix WinNonlin 8.1

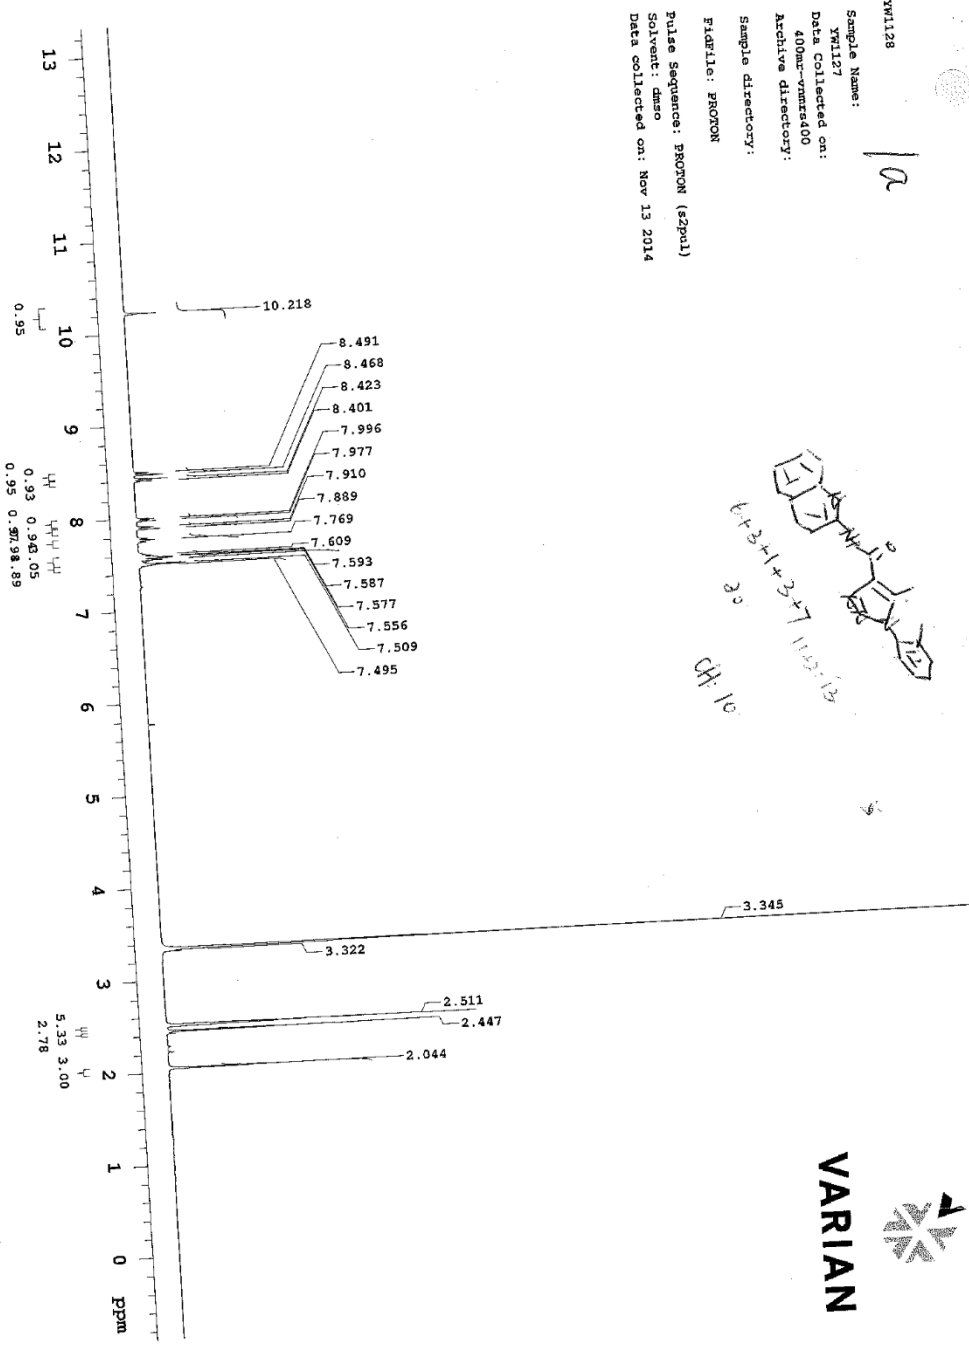

Figure S6. <sup>1</sup>H NMR spectrum of compound 3a

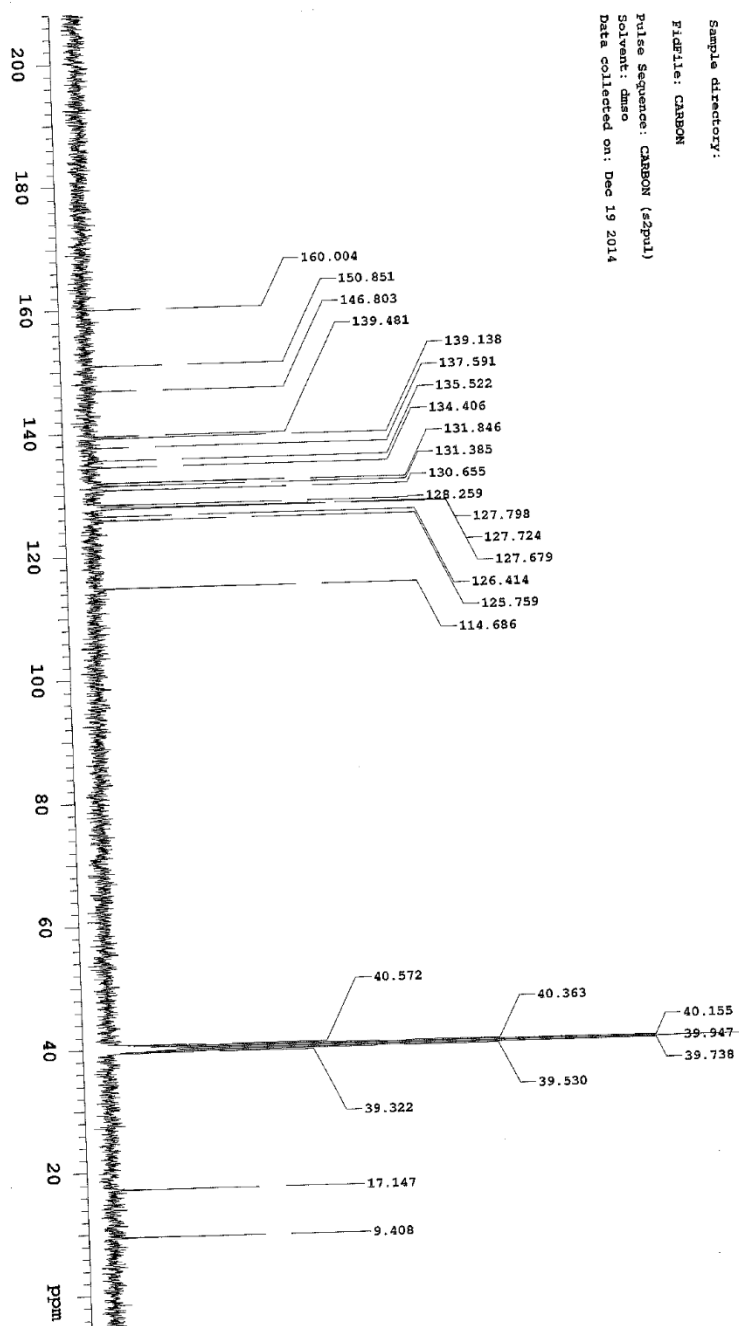

Figure S7.  $^{13}\text{C}$  NMR spectrum of compound 3a





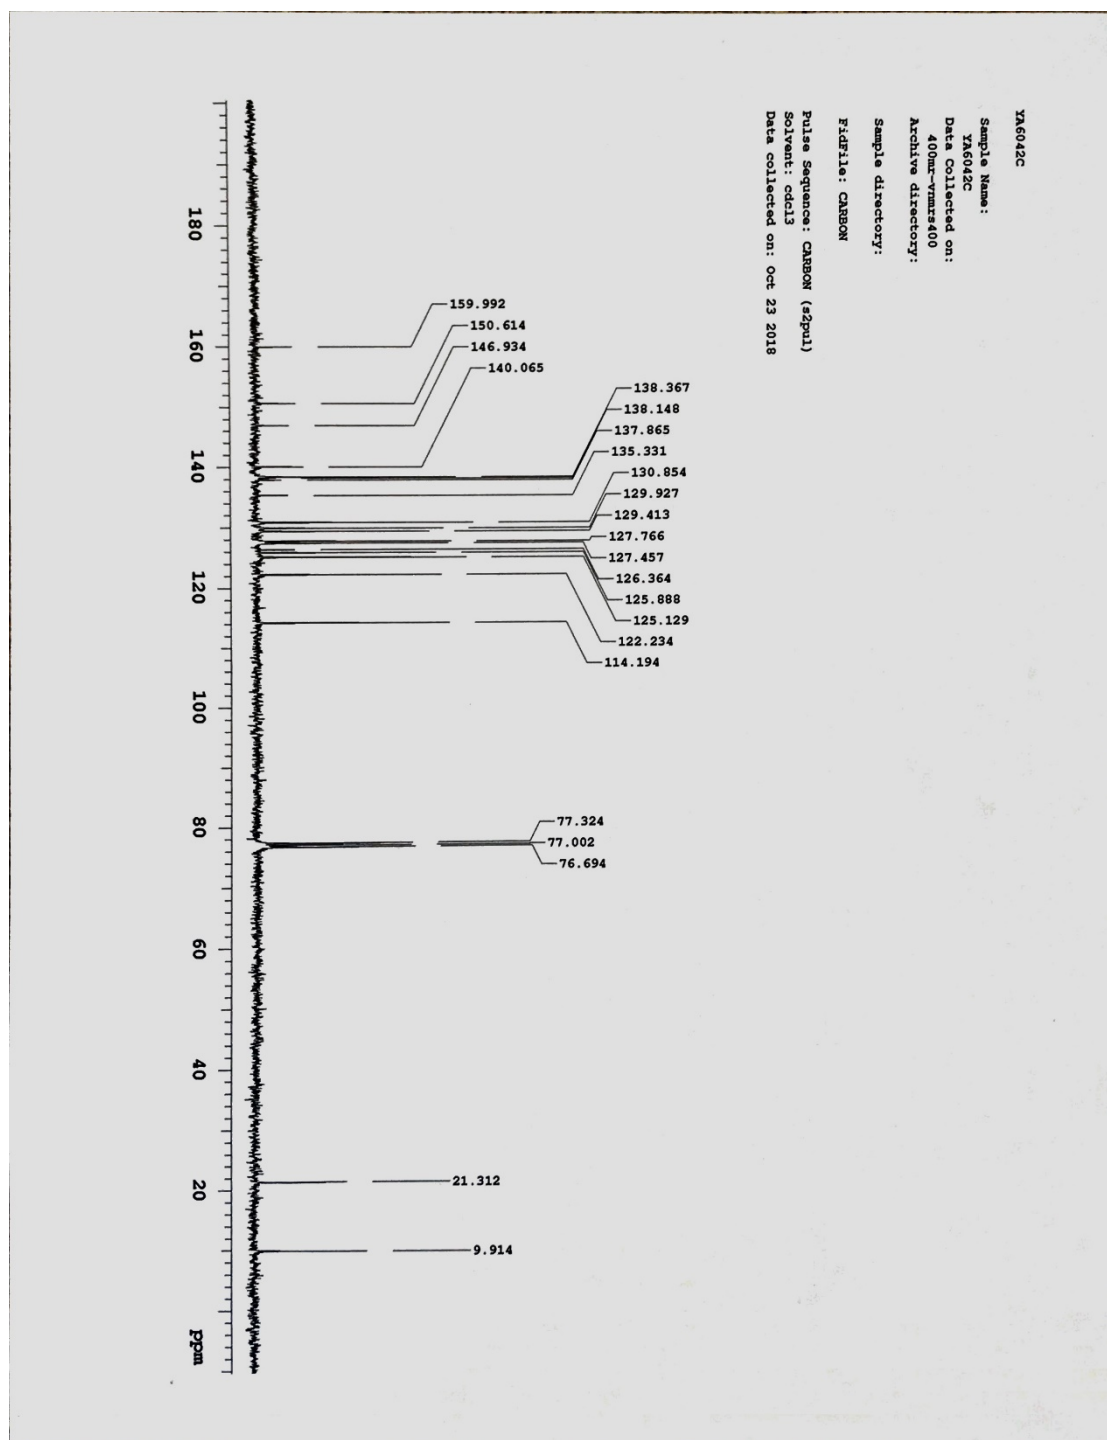

Figure S9.  $^{13}\text{C}$  NMR spectrum of compound **3b**

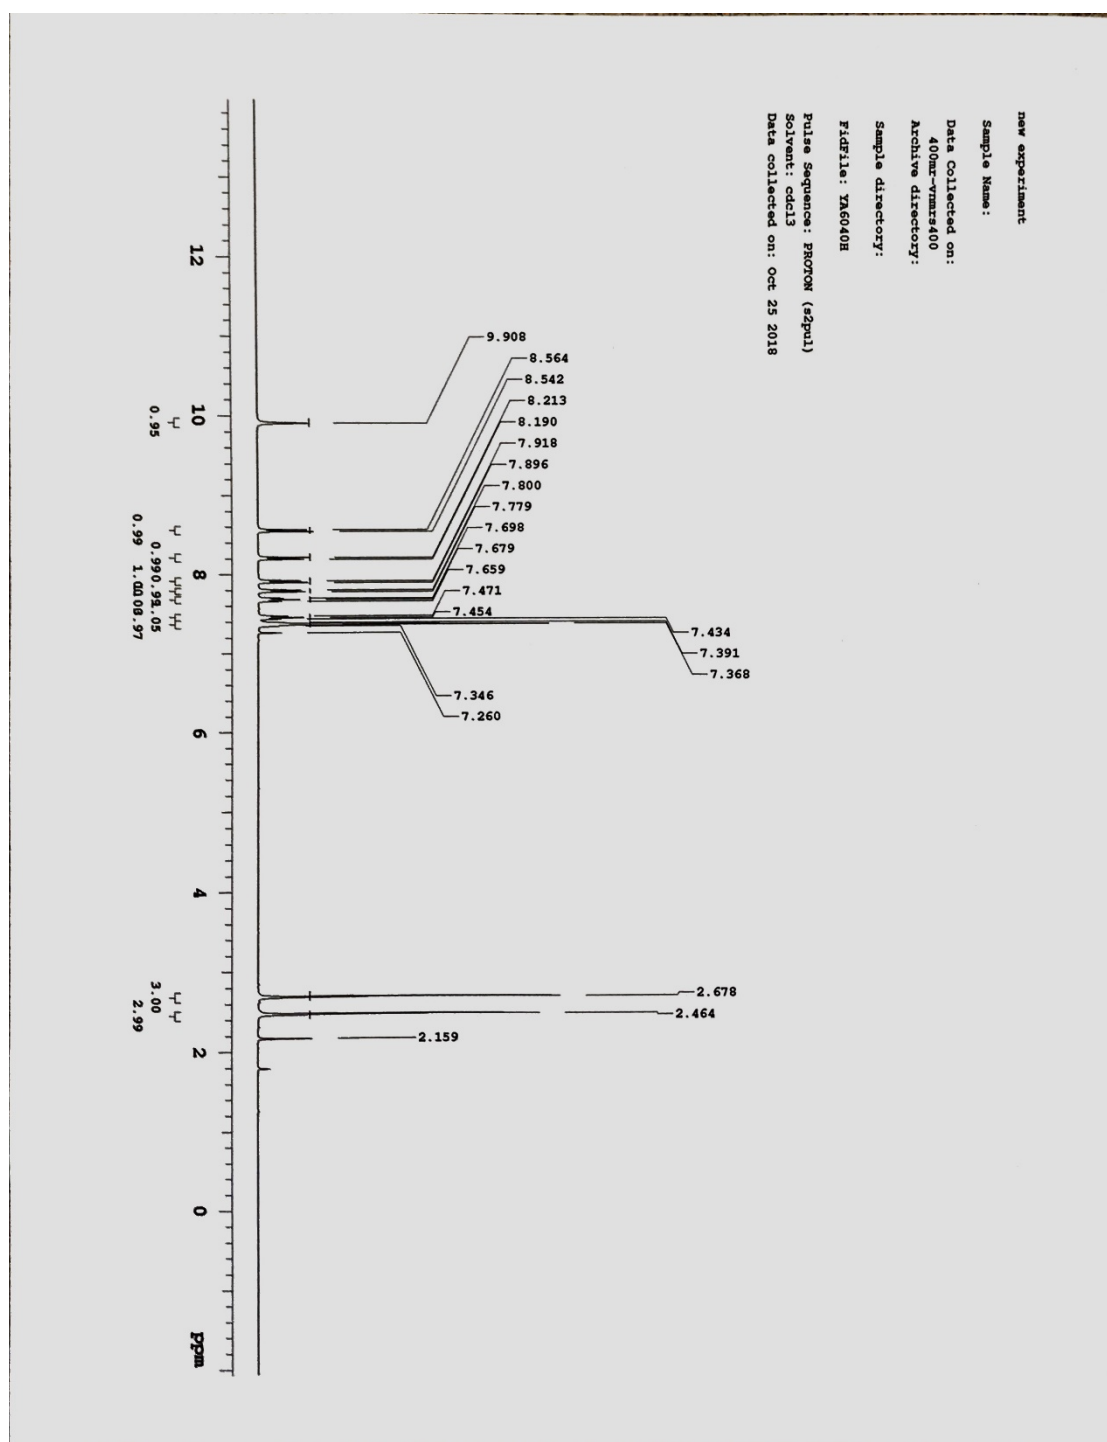

Figure S10.  $^1\text{H}$  NMR spectrum of compound **3c**

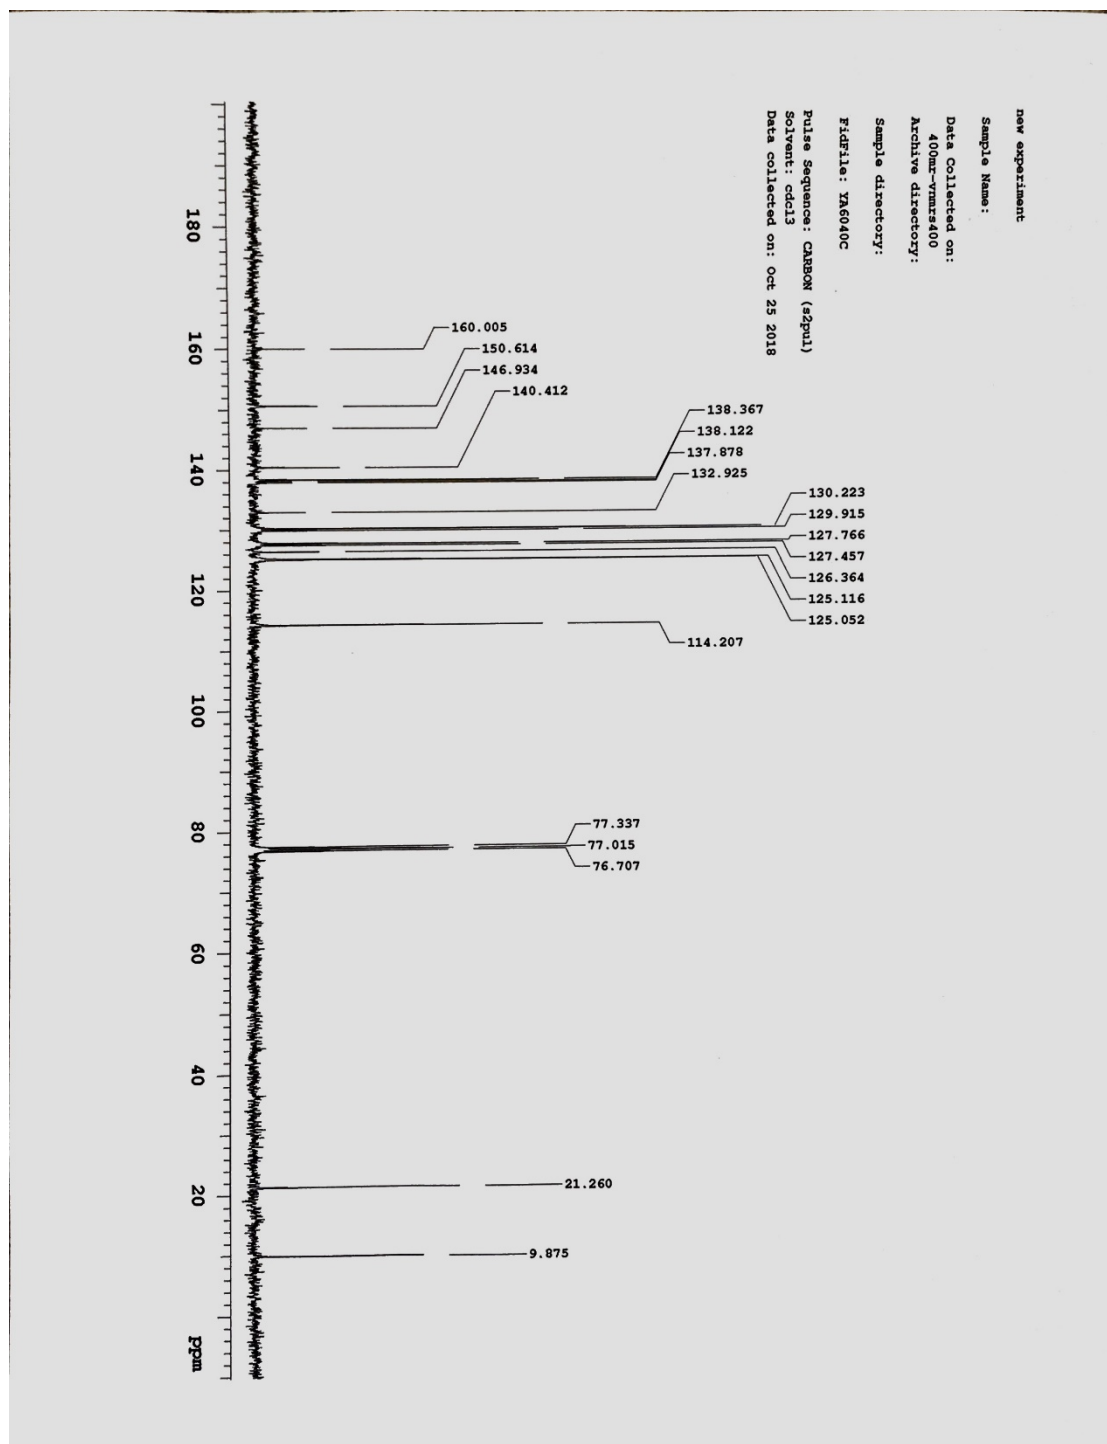

Figure S11.  $^{13}\text{C}$  NMR spectrum of compound **3c**

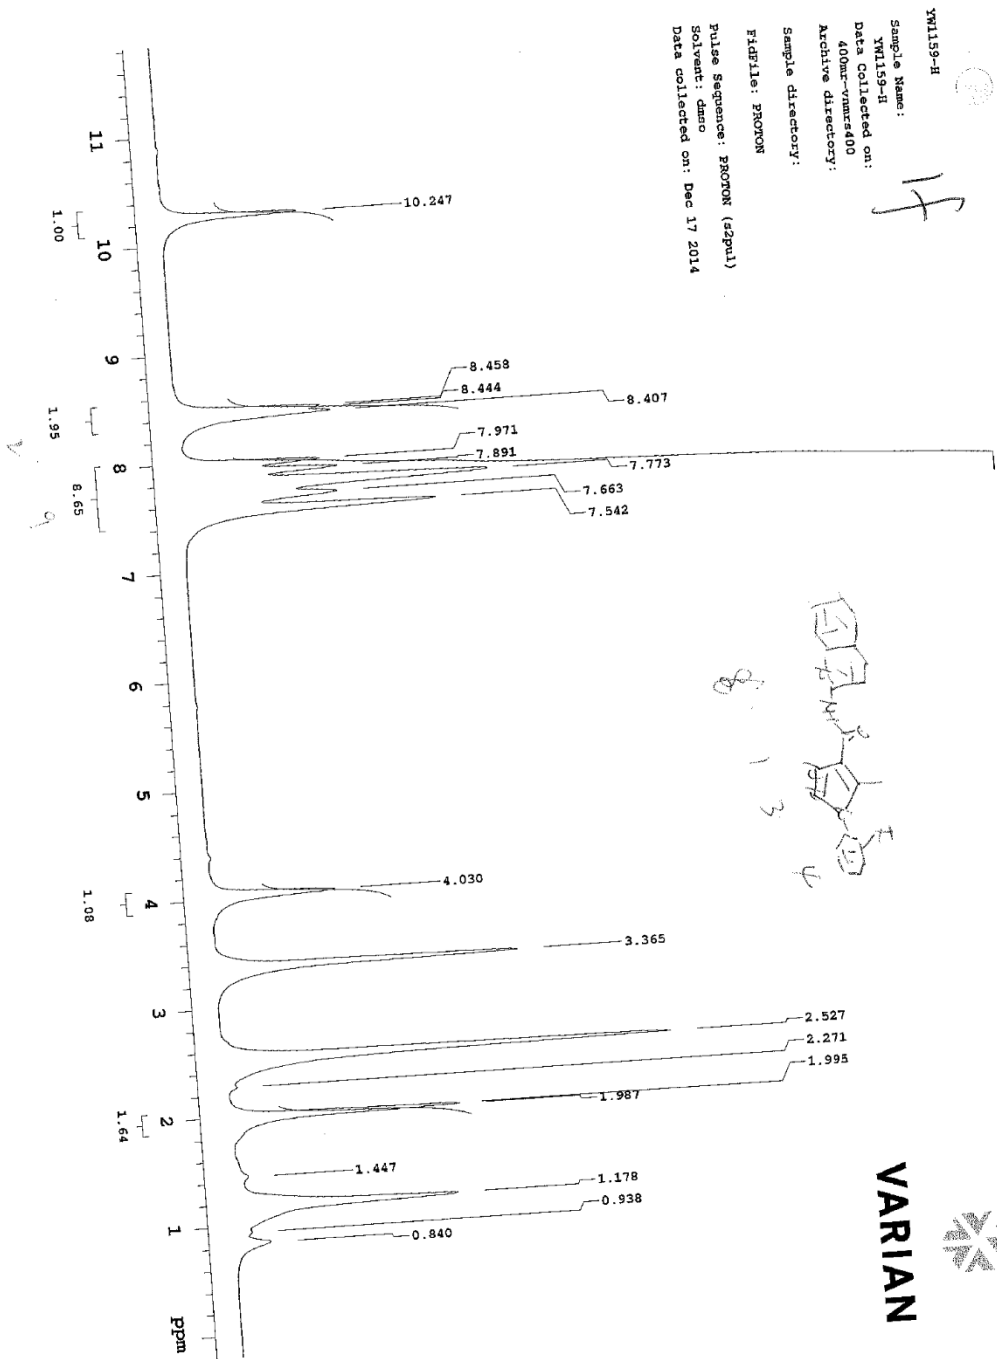

Figure S12. <sup>1</sup>H NMR spectrum of compound 3d

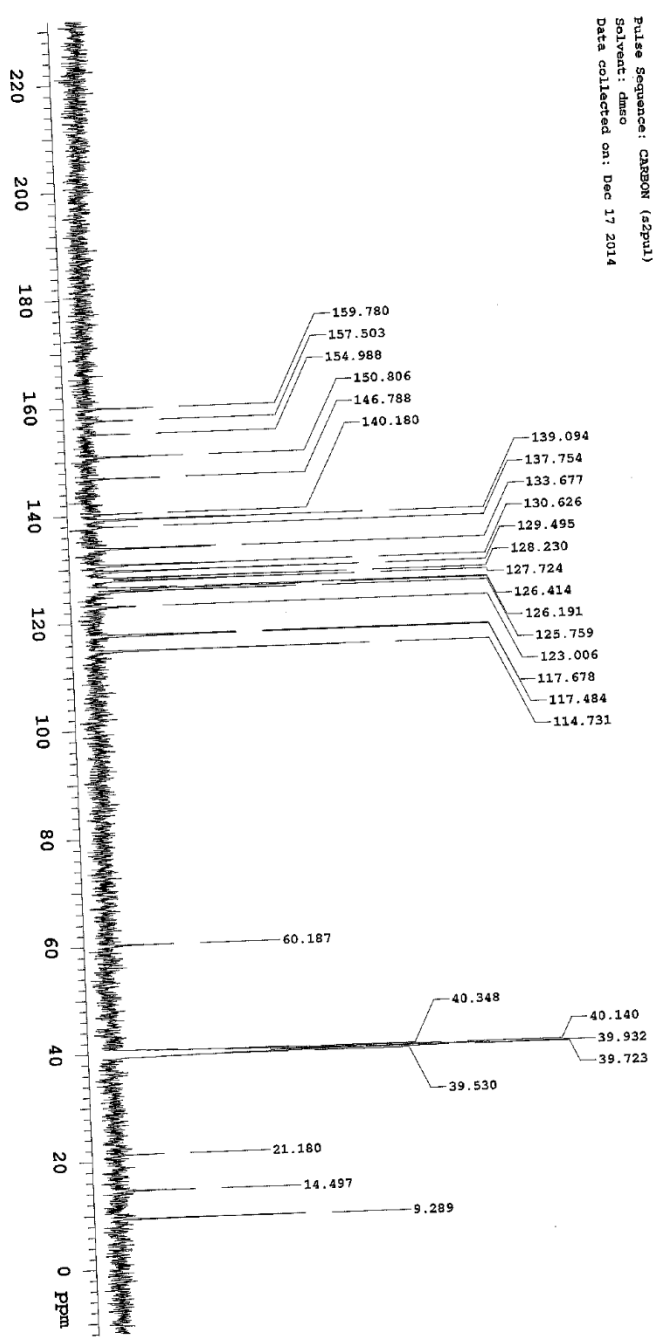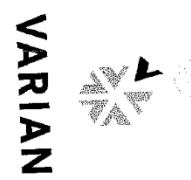

Figure S13. <sup>13</sup>C NMR spectrum of compound 3d

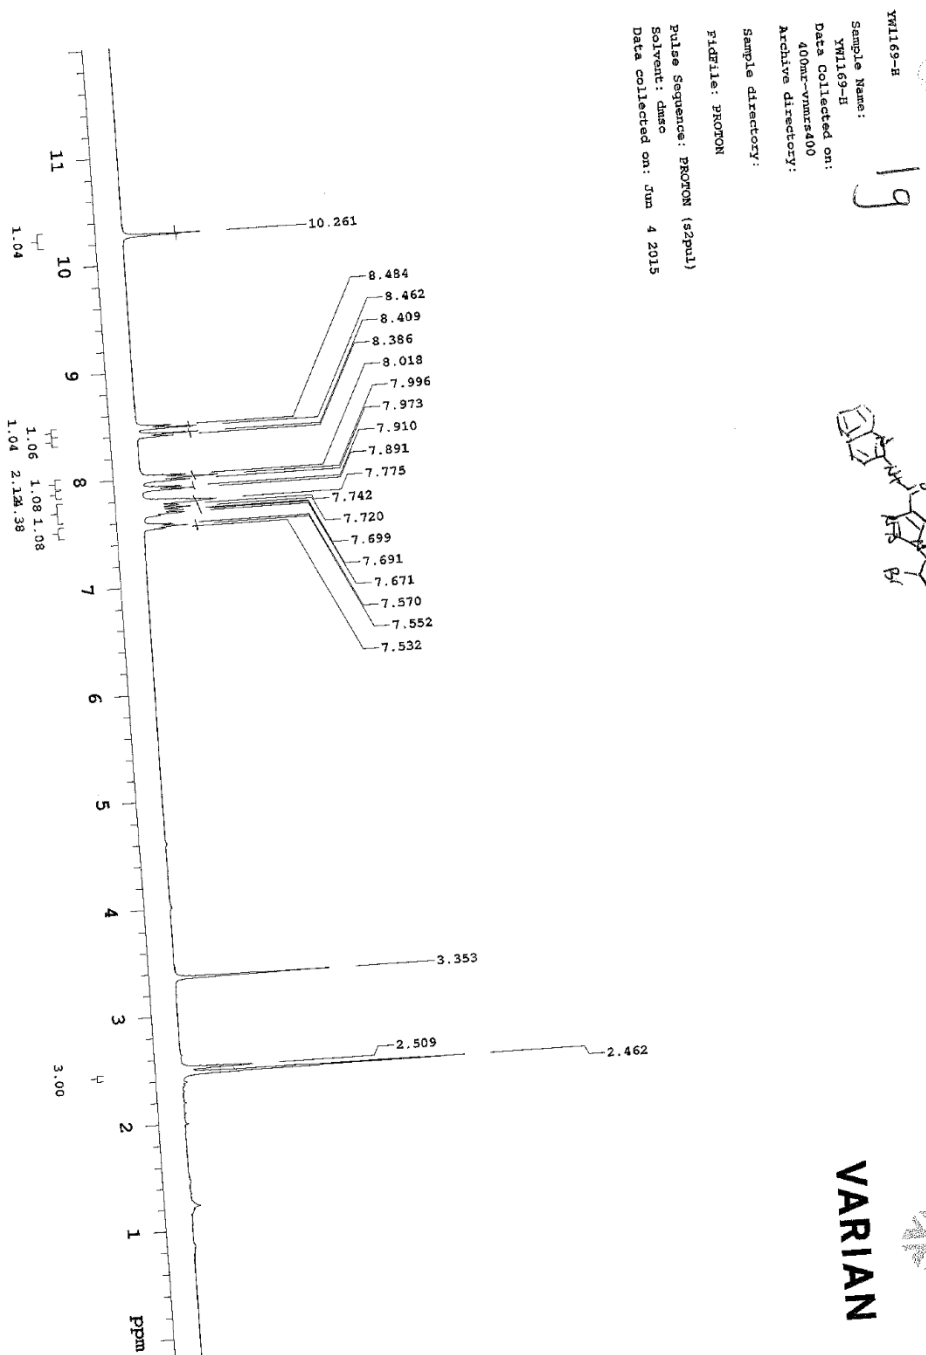

Figure S14. <sup>1</sup>H NMR spectrum of compound 3e

xm1169-c

19

Sample Name:  
Date Collected on:  
400m-vnmr400  
Archive directory:  
Sample directory:  
F1DirFile: CARBON  
Pulse Sequence: CARBON (zgpg1)  
Solvent: cdcl3  
Data collected on: Jun 4 2015

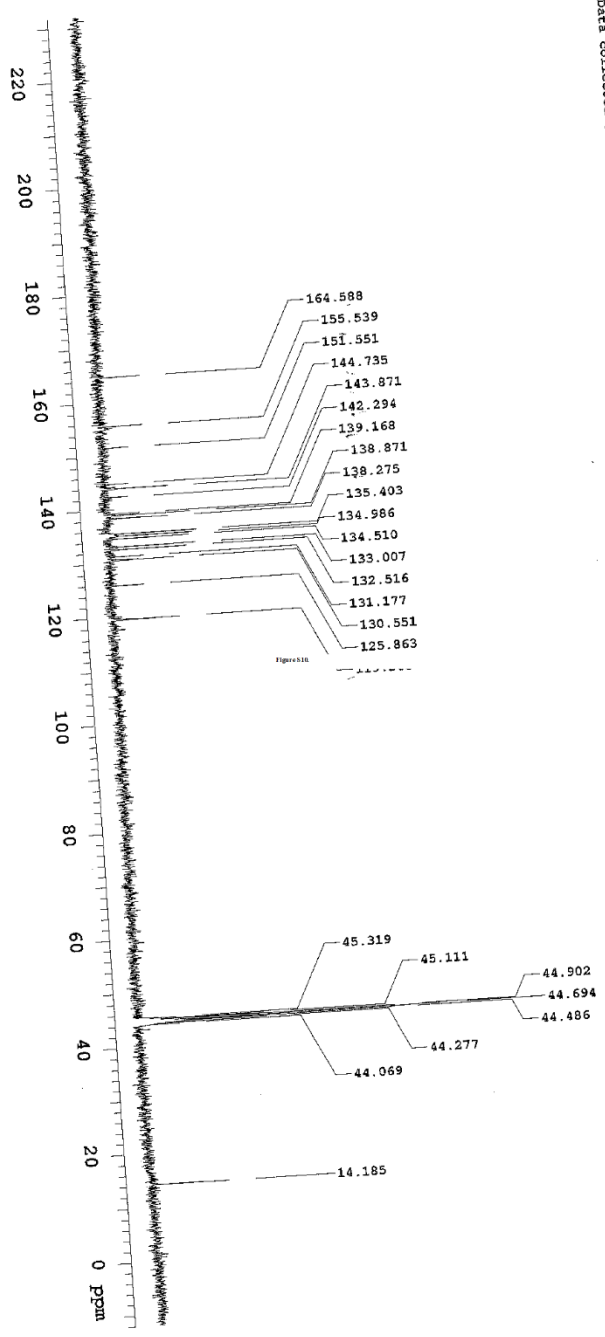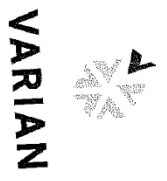

Figure S15. <sup>13</sup>C NMR spectrum of compound 3e





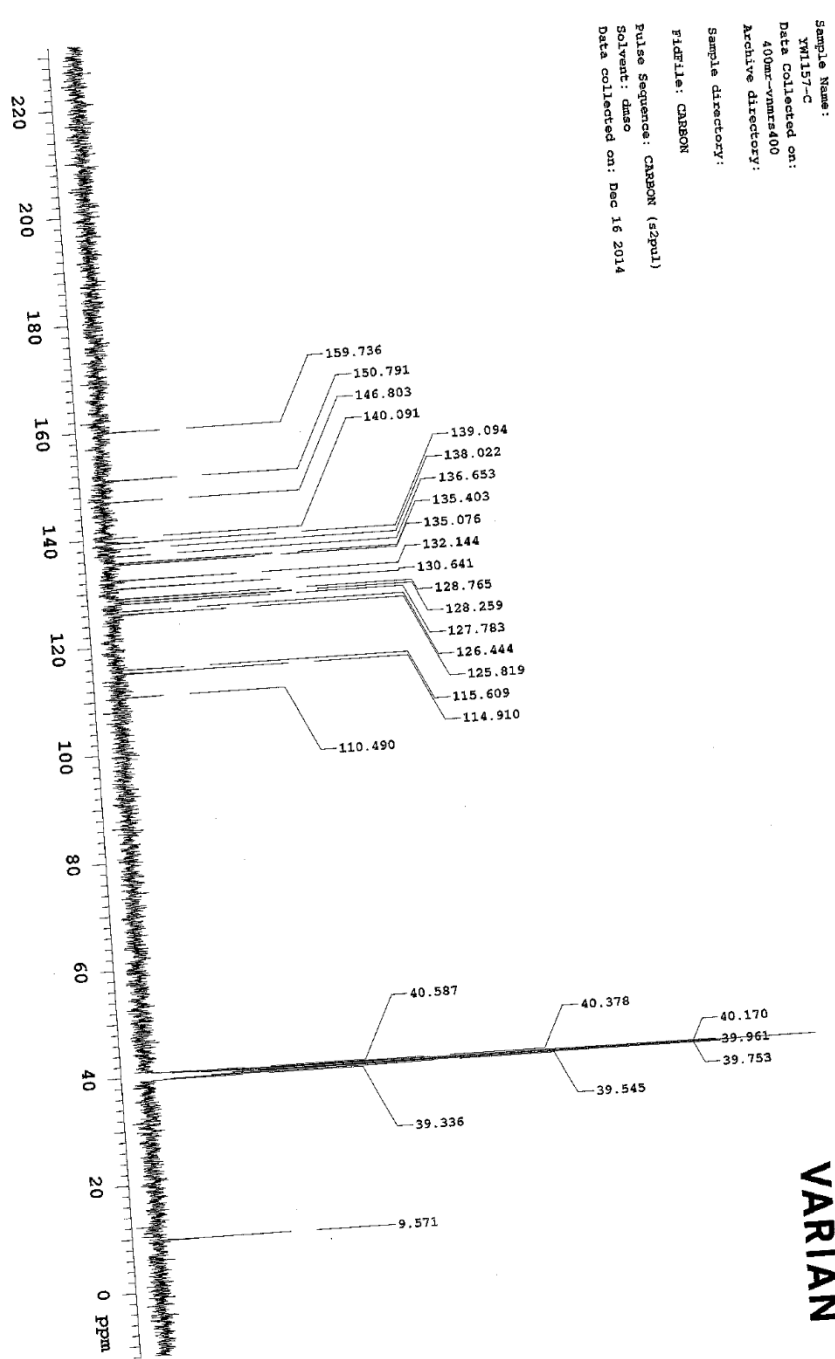

Figure S17. <sup>13</sup>C NMR spectrum of compound 3f

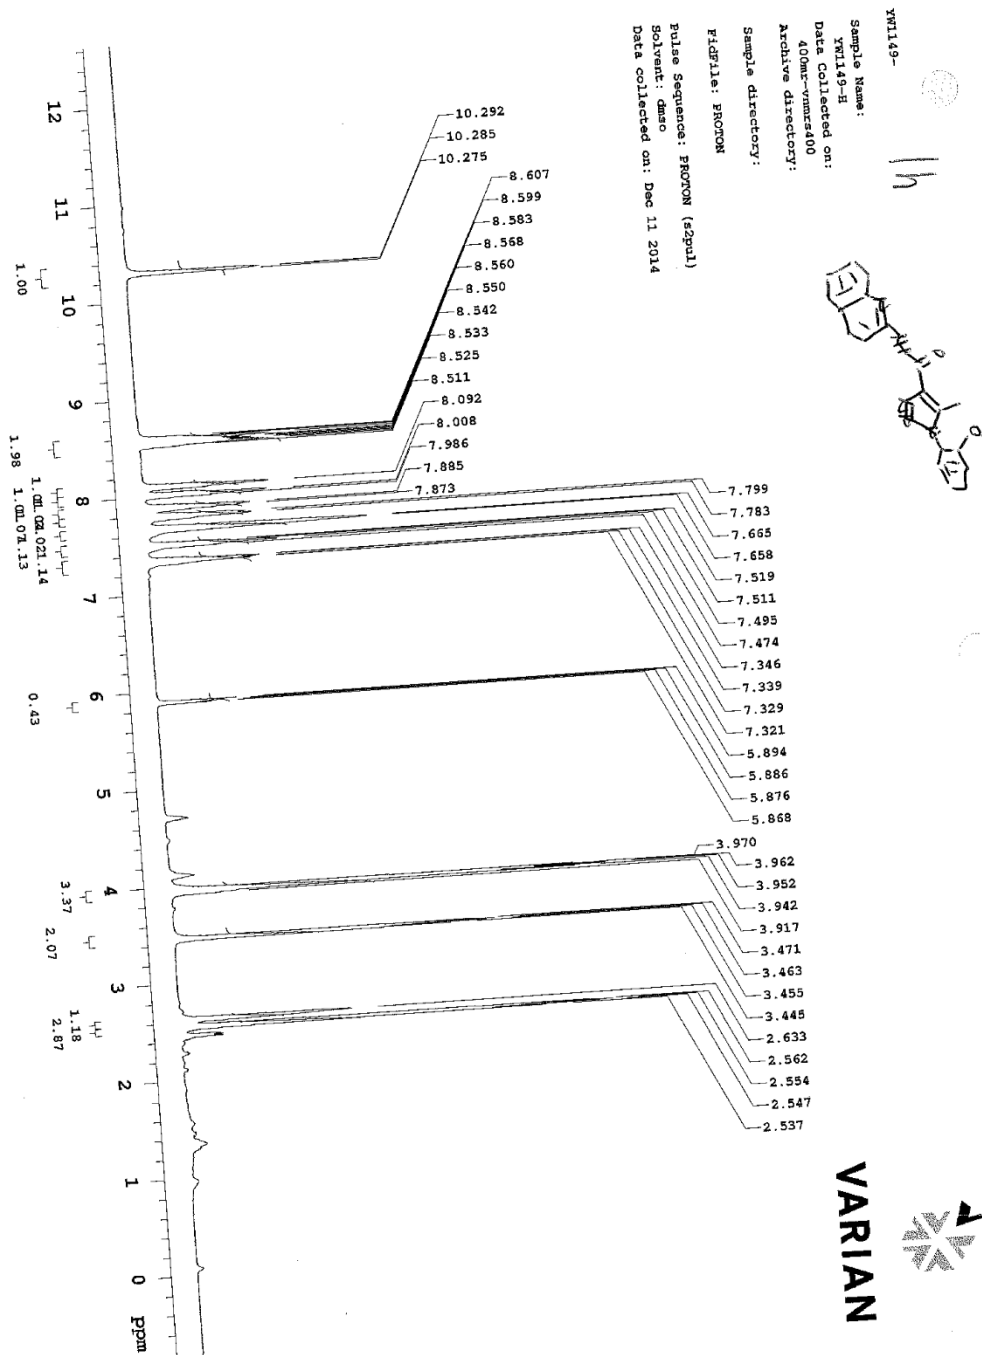

Figure S18. <sup>1</sup>H NMR spectrum of compound 3g

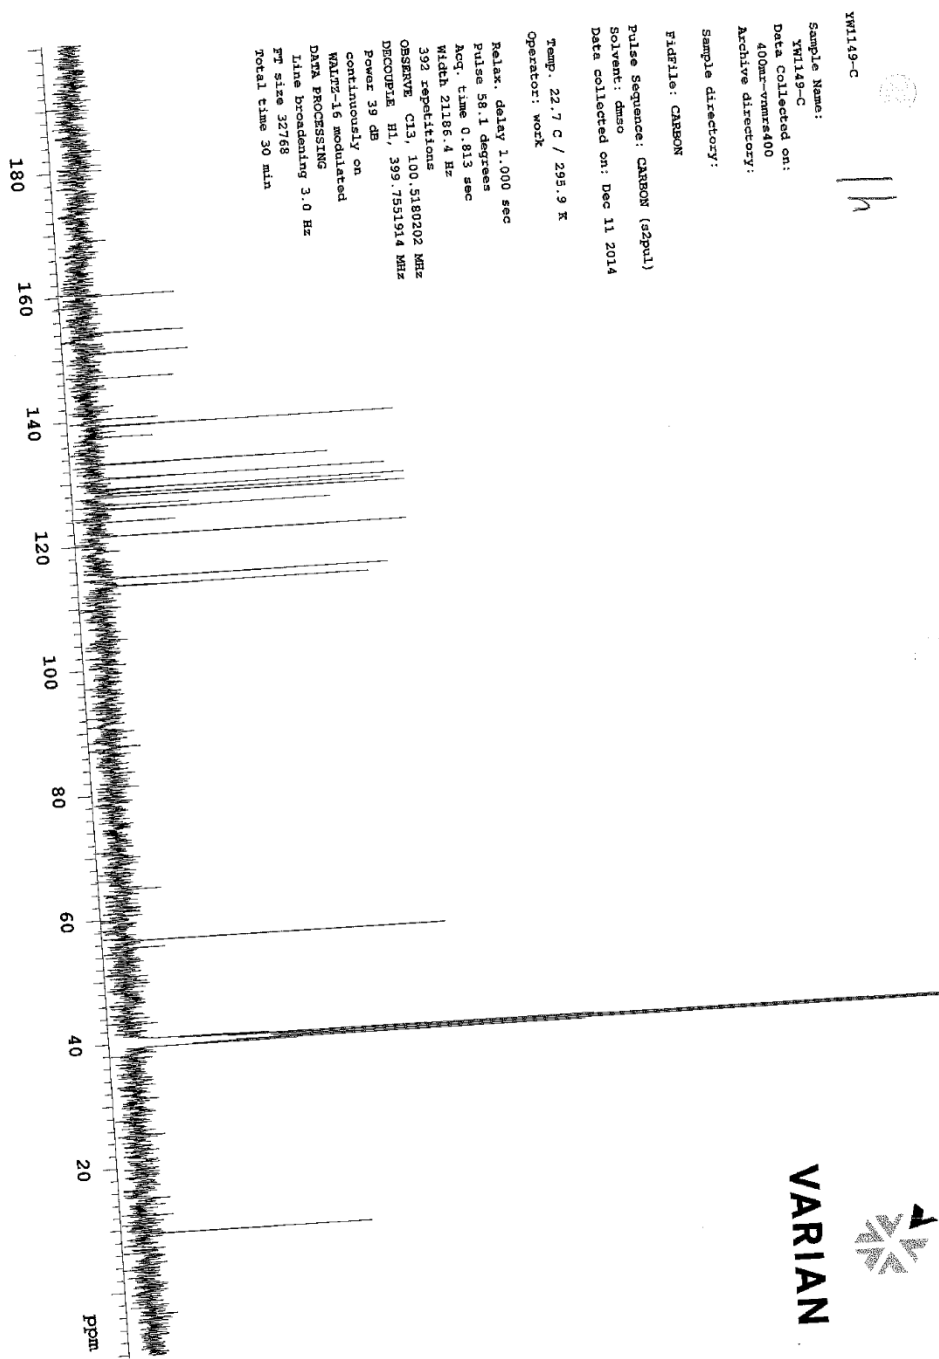

Figure S19.  $^{13}\text{C}$  NMR spectrum of compound **3g**

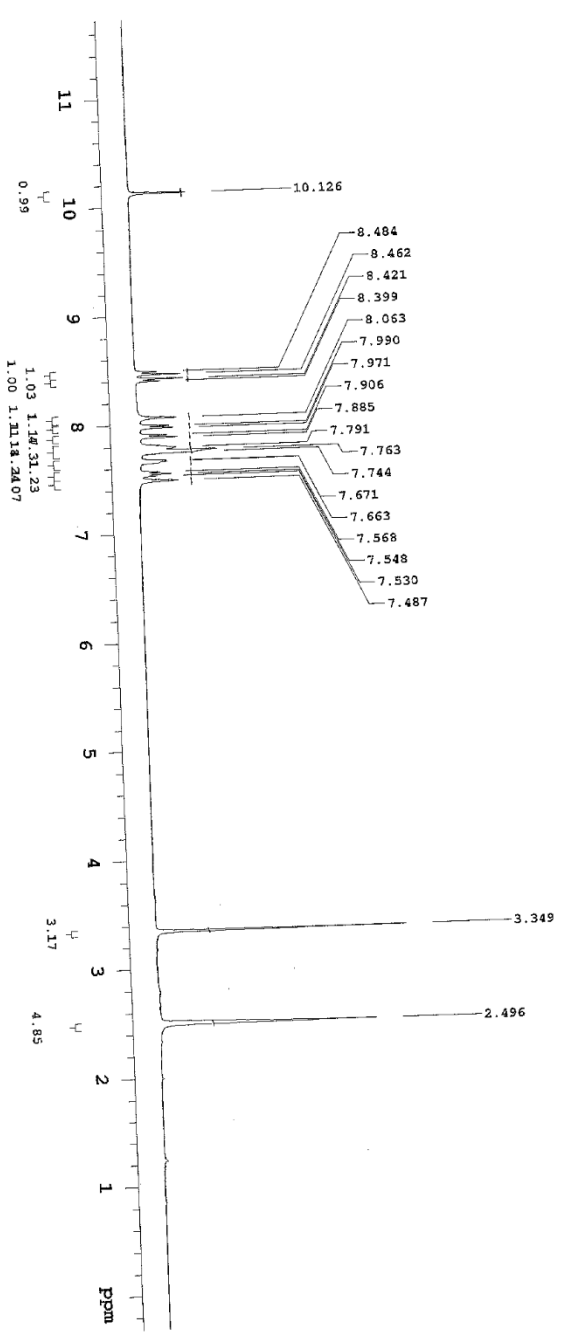

YML182-H  
 Sample Name:  
 Data Collected on:  
 400mm-Vnmr400  
 Archive directory:  
 Sample directory:  
 F1: FILE: PROTON  
 Pulse Sequence: PROTON (2pml)  
 Solvent: dms  
 Data collected on: Jun 6 2015

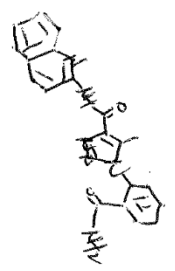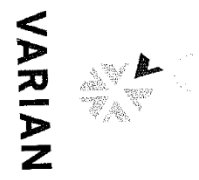

Figure S20. <sup>1</sup>H NMR spectrum of compound 3h

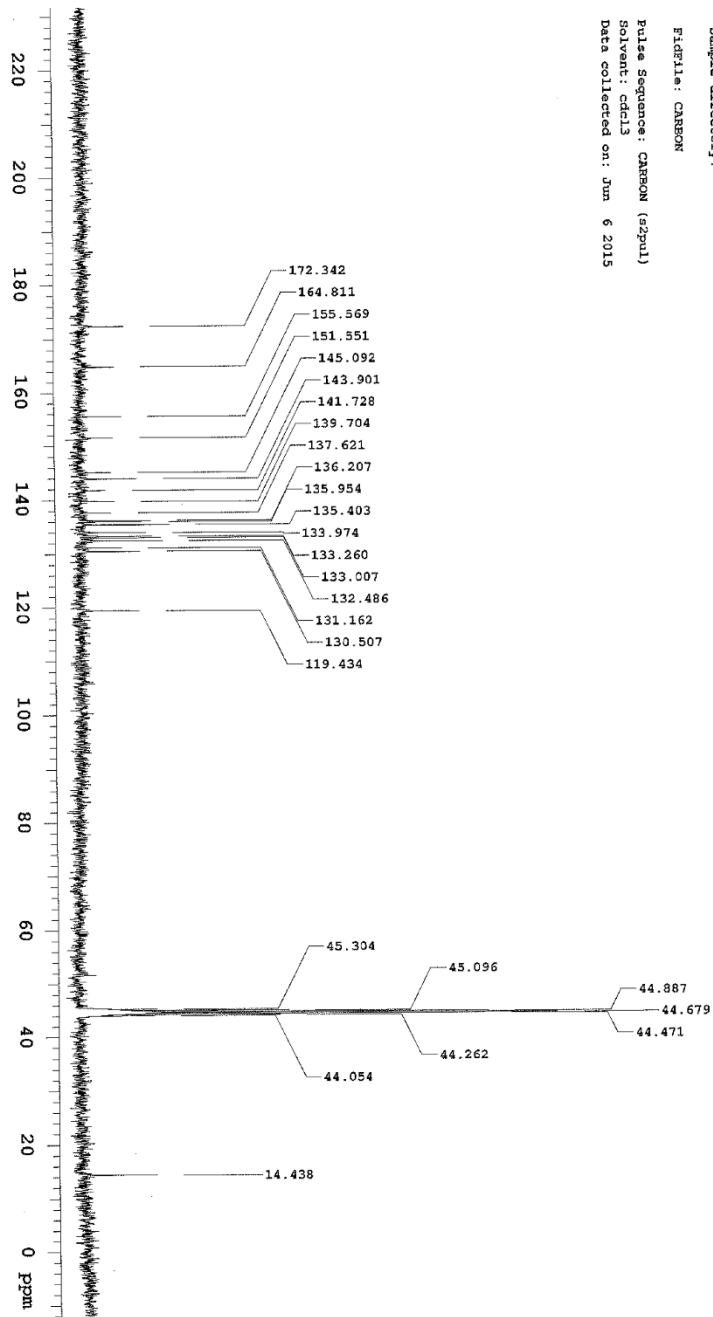

Figure S21.  $^{13}\text{C}$  NMR spectrum of compound **3h**

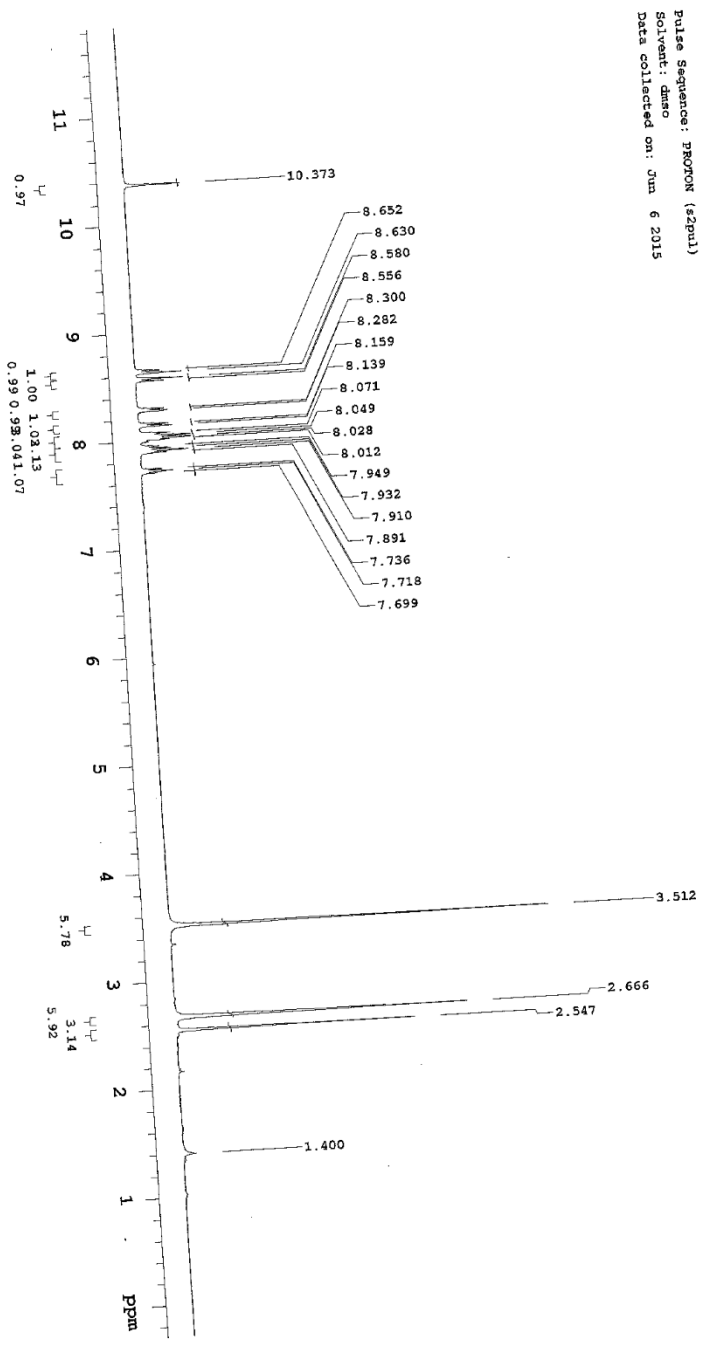

Sample Name: YW1181-H  
 Data Collected on: 4/06/2015  
 Archive directory:  
 Sample directory:  
 FIDFile: PROTON  
 Pulse Sequence: PROTON (s2pu1)  
 Solvent: dmso  
 Data collected on: Jun 6 2015

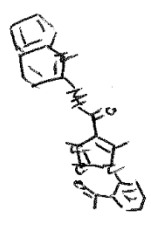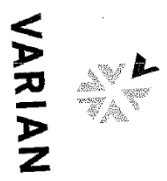

Figure S22. <sup>1</sup>H NMR spectrum of compound 3i

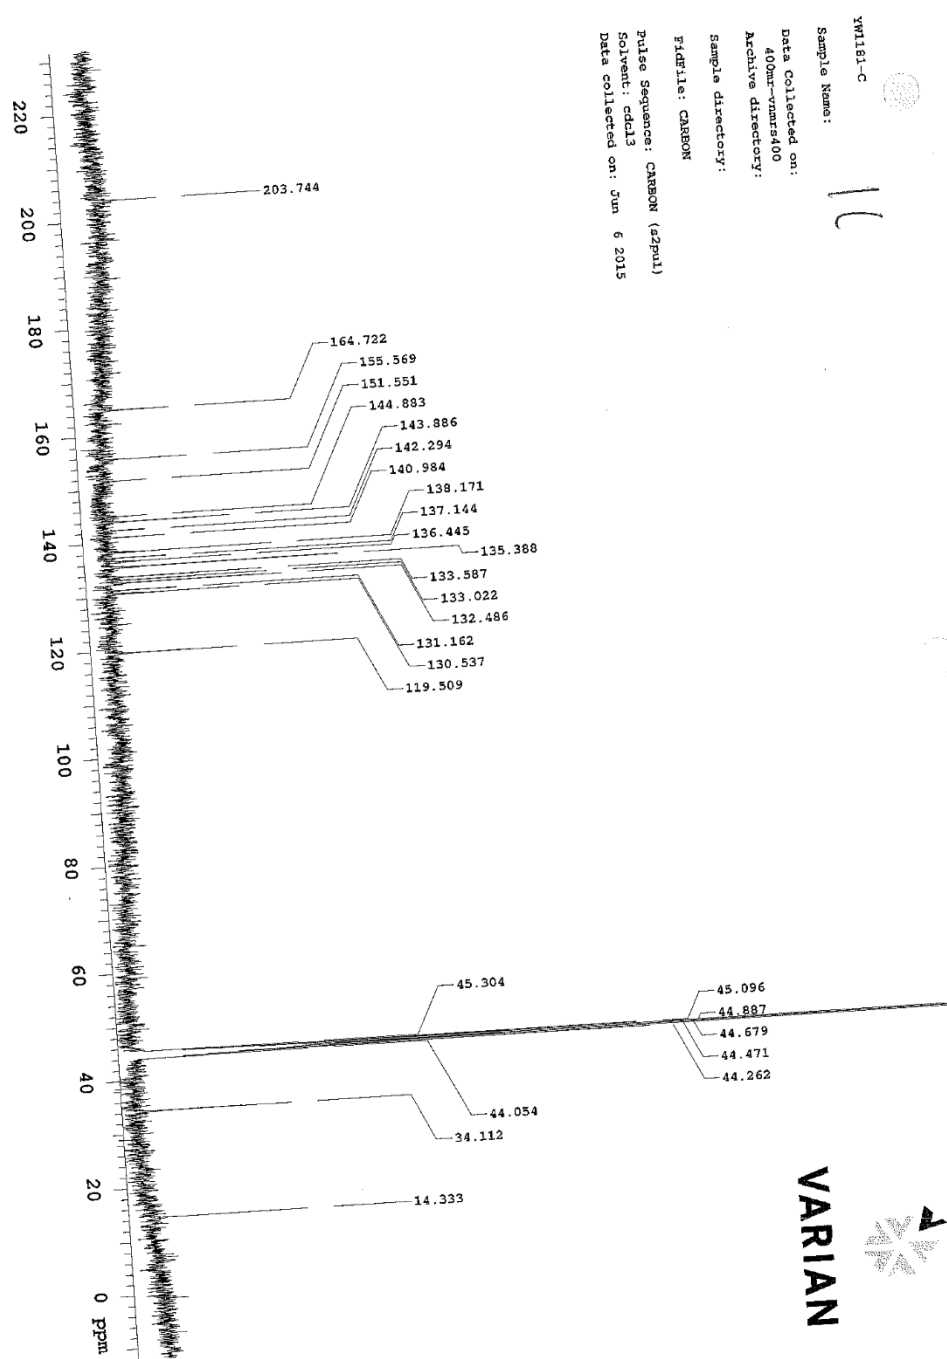

Figure S23. <sup>13</sup>C NMR spectrum of compound 3i



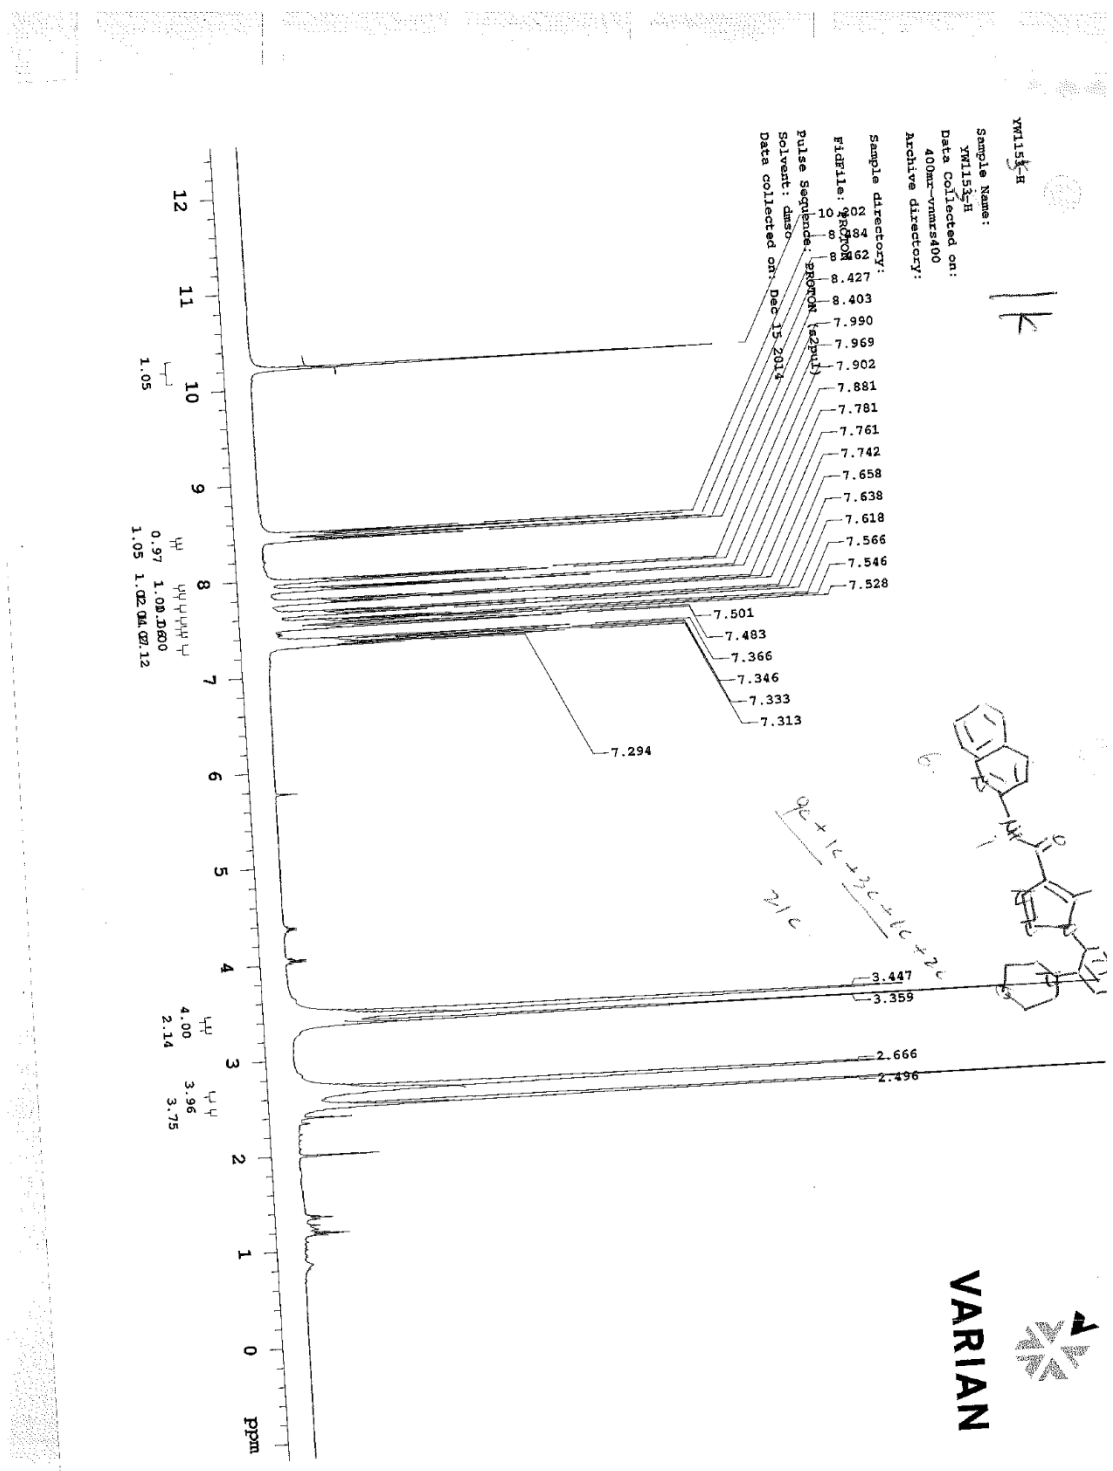

Figure S24. <sup>1</sup>H NMR spectrum of compound 3j

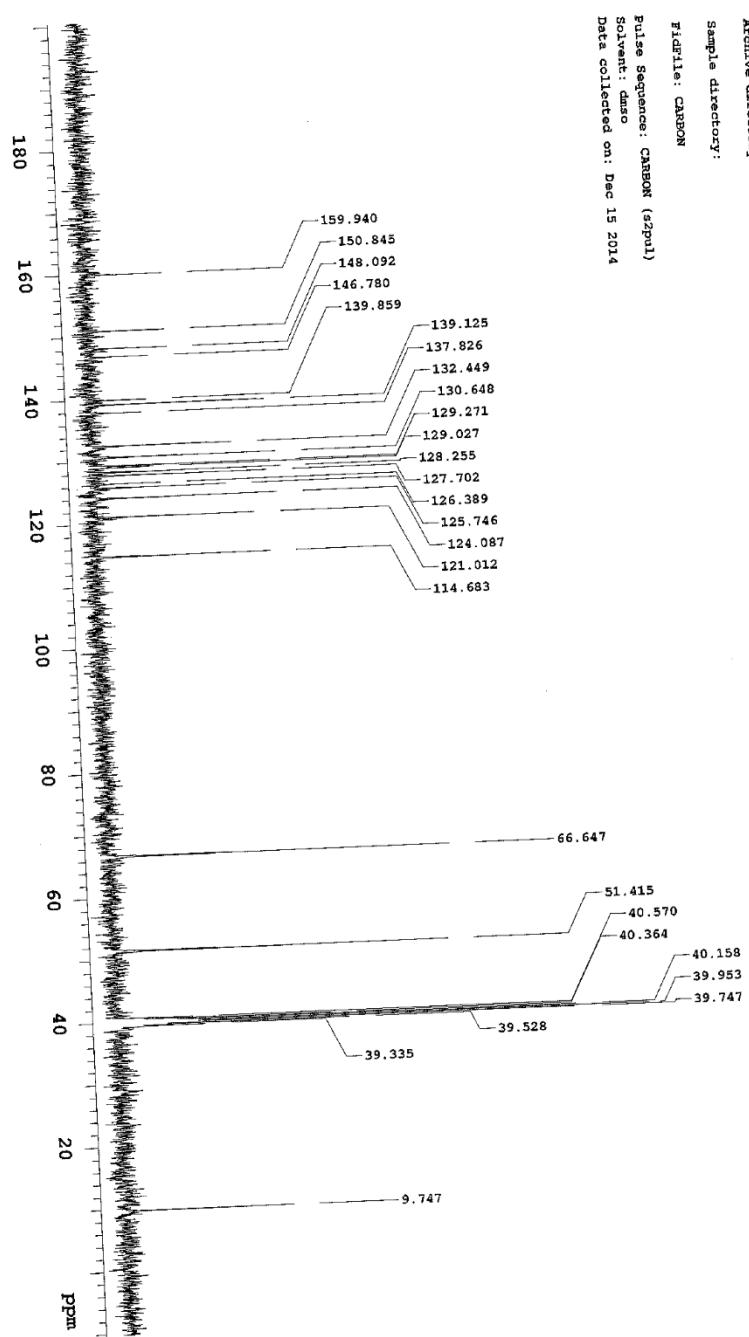

Figure S25. <sup>13</sup>C NMR spectrum of compound 3j

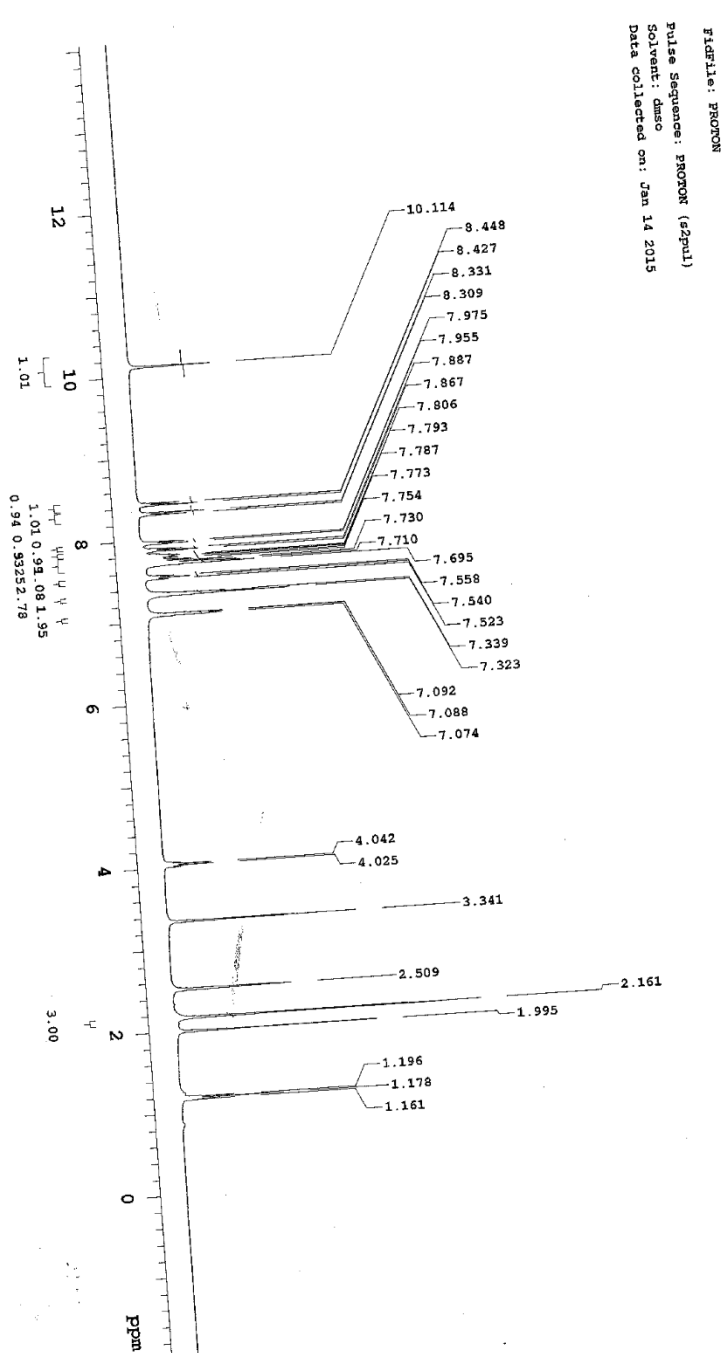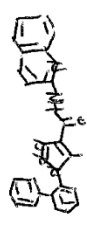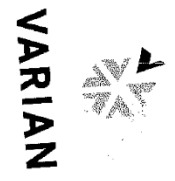

Figure S26. <sup>1</sup>H NMR spectrum of compound 3k

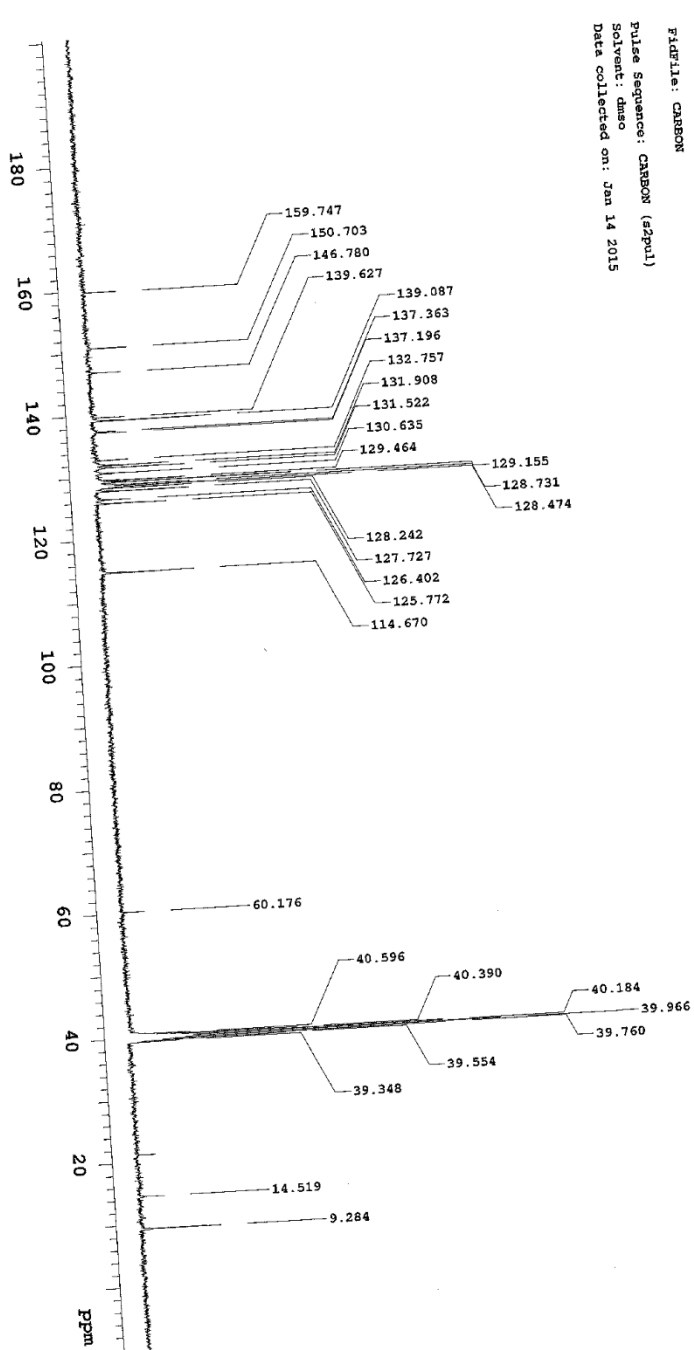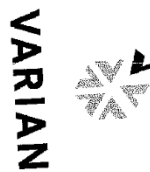

Figure S27. <sup>13</sup>C NMR spectrum of compound 3k

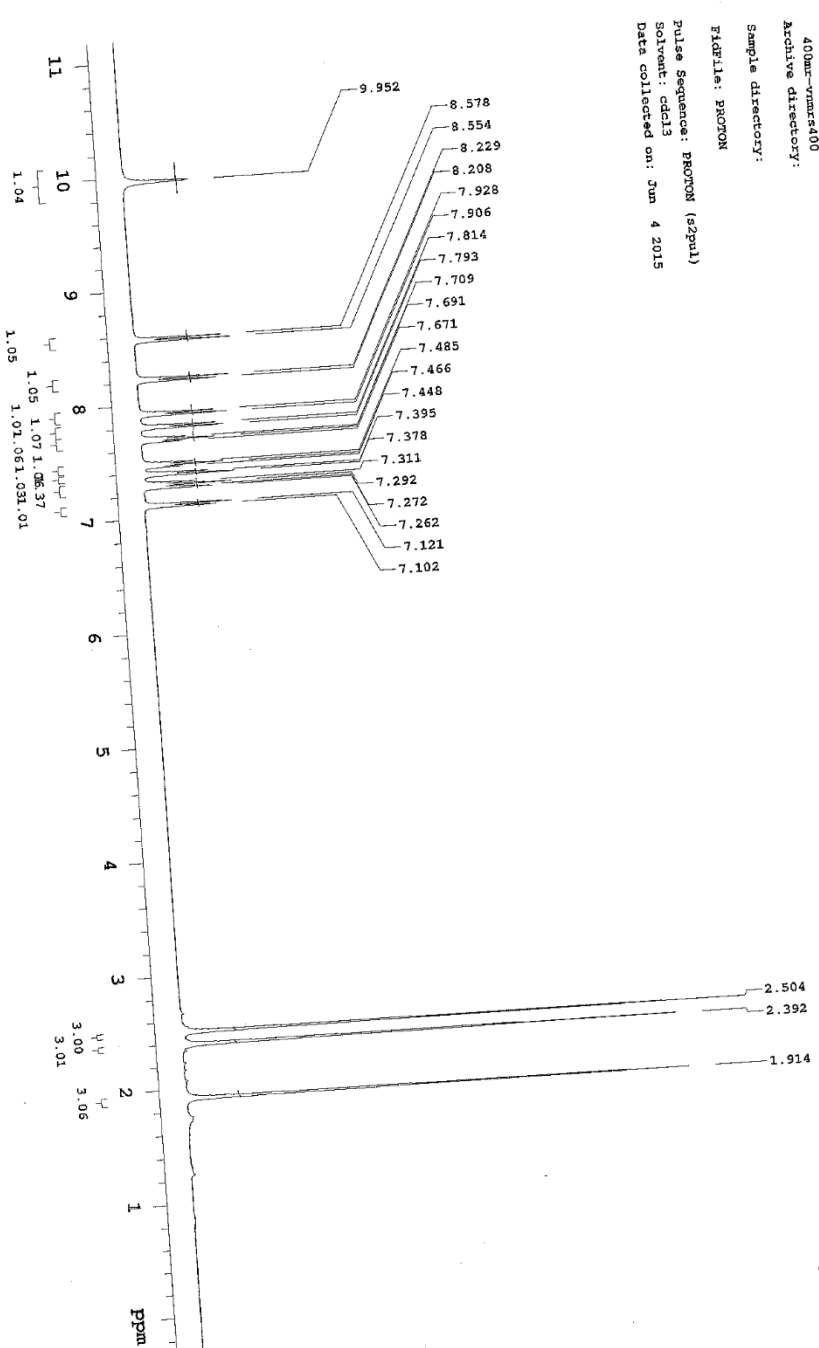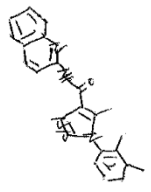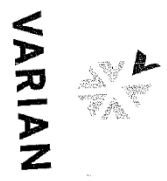

Figure S28. <sup>1</sup>H NMR spectrum of compound 3I

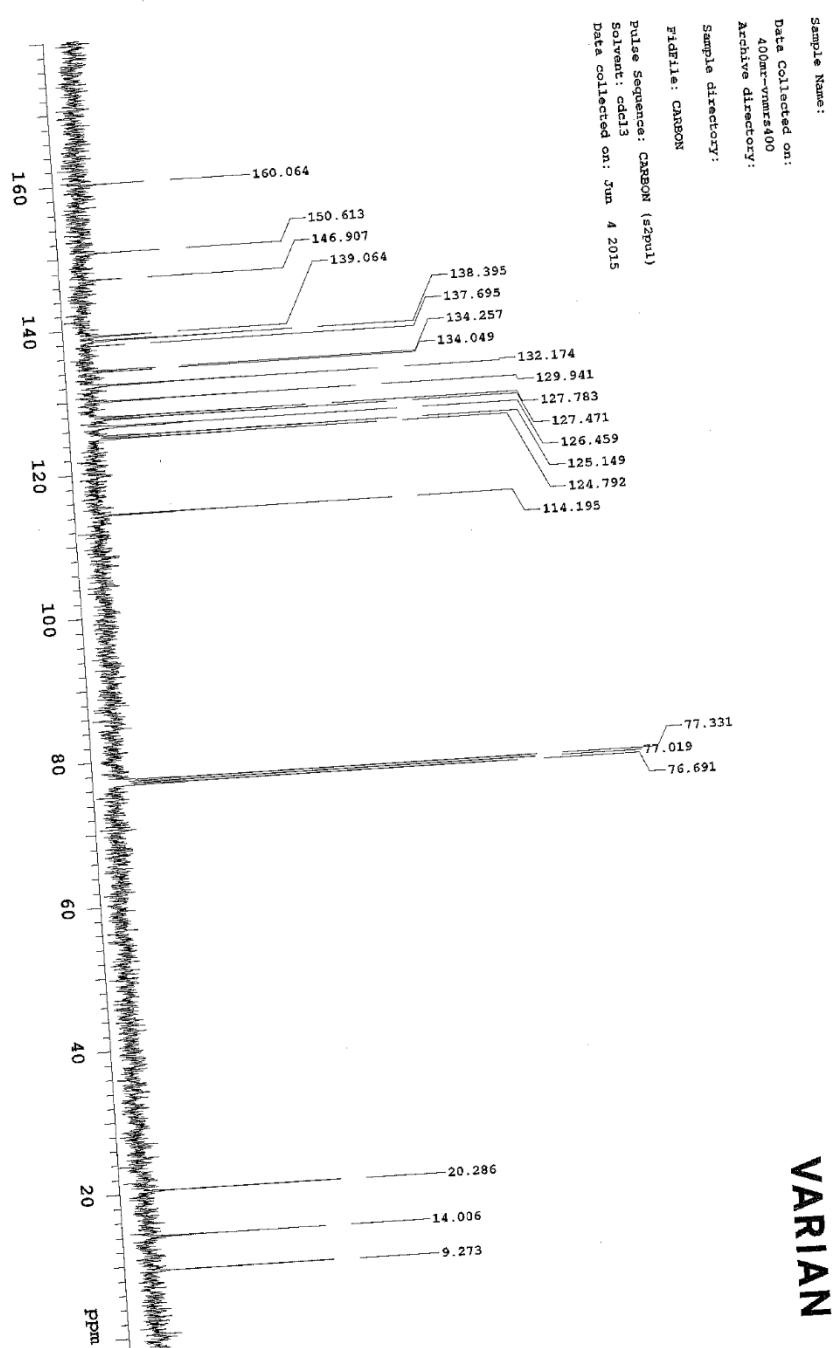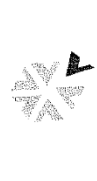

Figure S29. <sup>13</sup>C NMR spectrum of compound 31

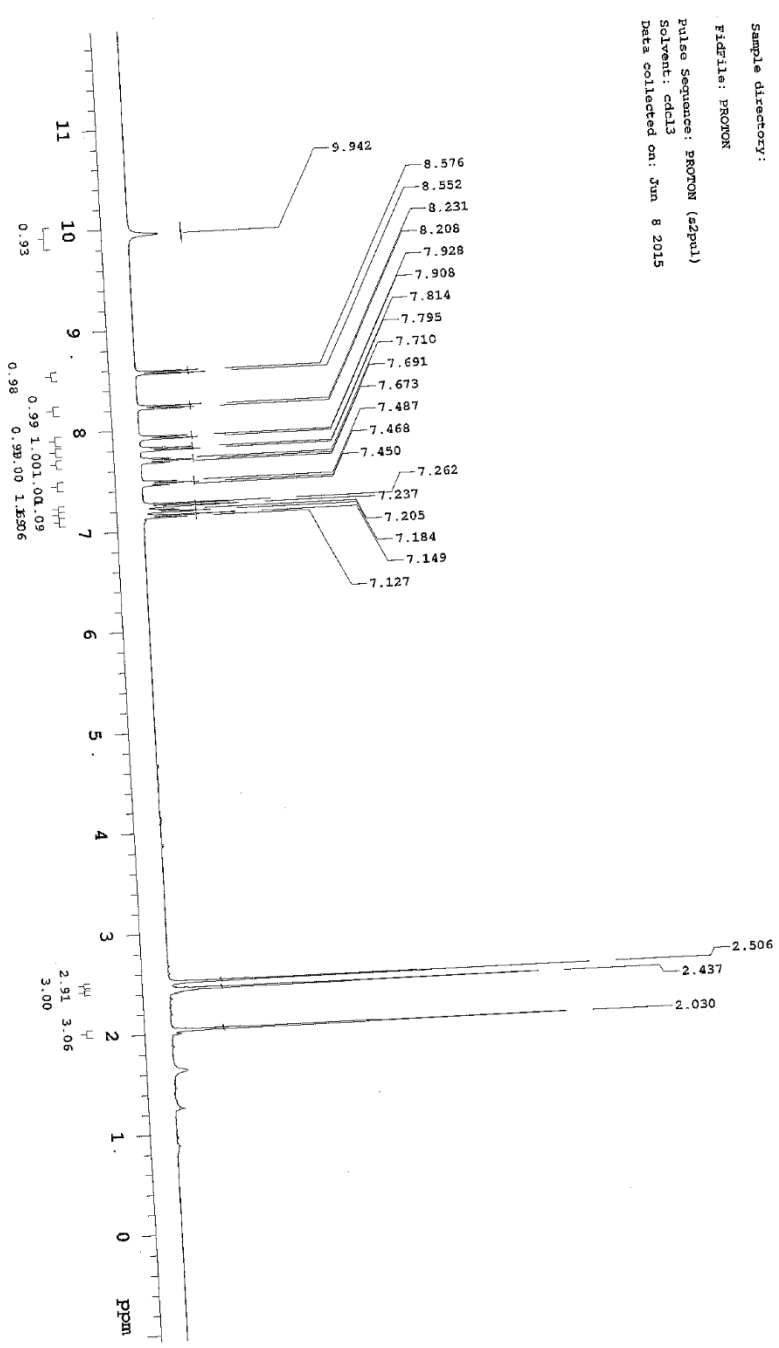

YMH179-H  
 Sample Name: YMH179-H  
 Data Collected on: 400mhz-nmr-400  
 Archive directory:  
 Sample directory:  
 FIDFile: PROTON  
 Pulse Sequence: PROTON (a2pu1)  
 Solvent: cdcl3  
 Data collected on: Jun 8 2015

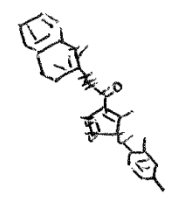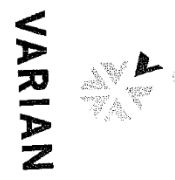

Figure S30. <sup>1</sup>H NMR spectrum of compound 3m

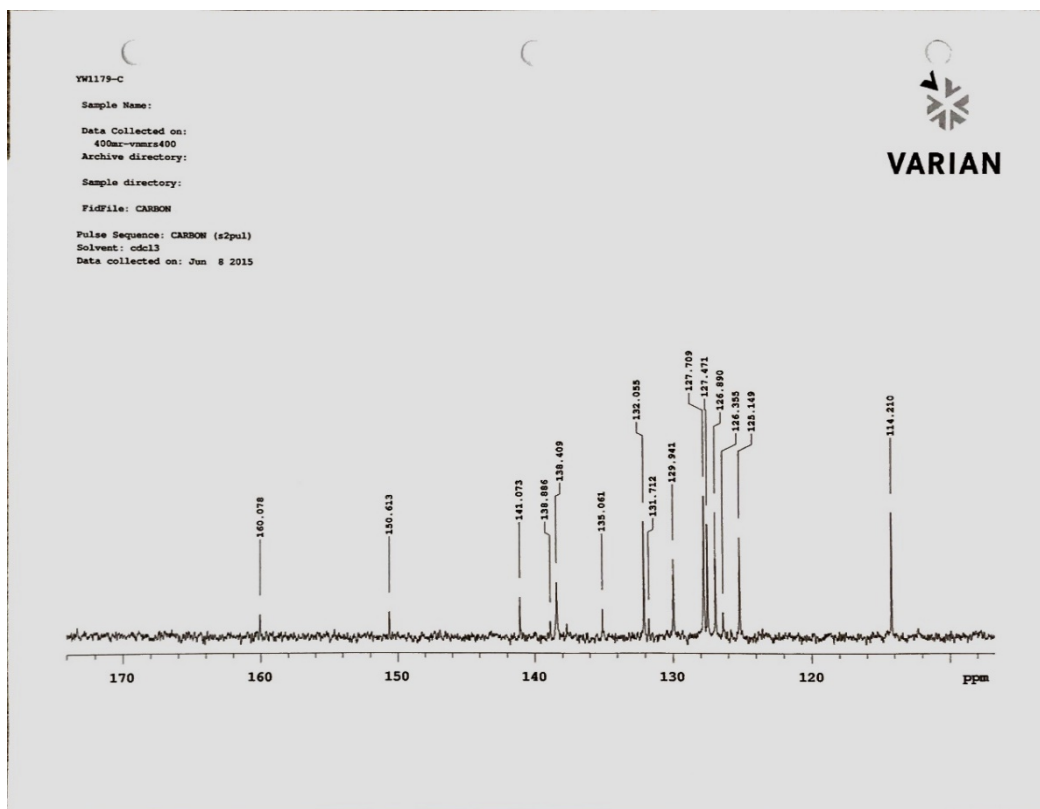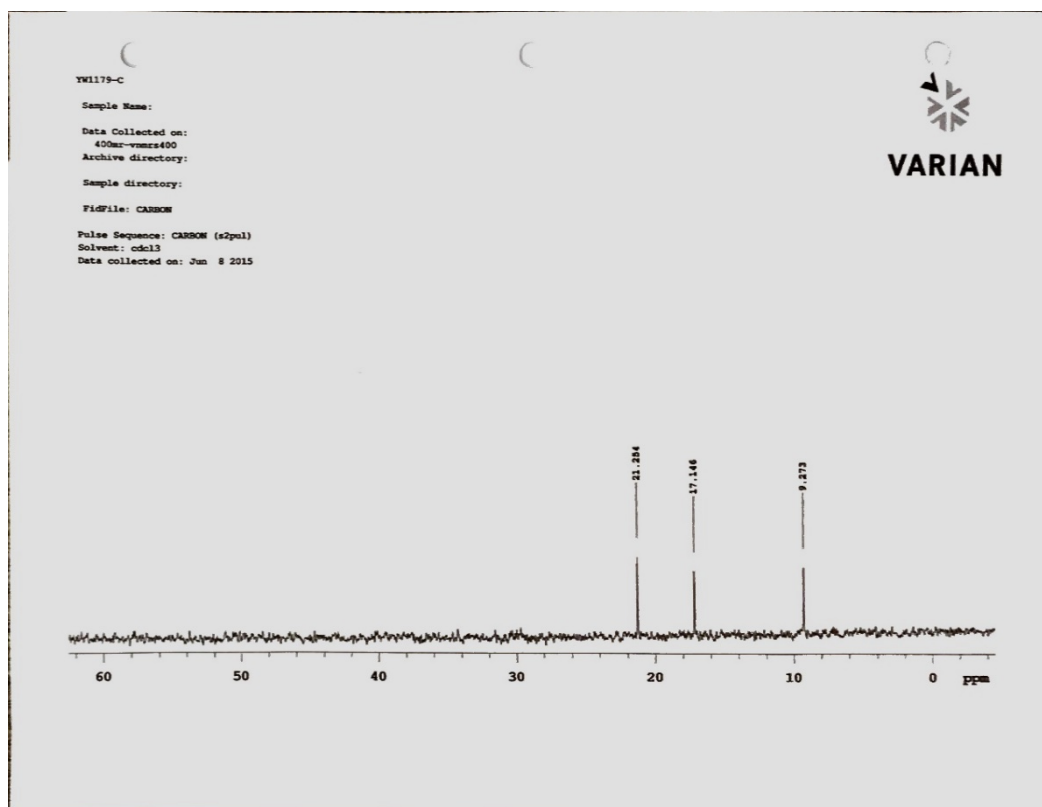

Figure S31.  $^{13}\text{C}$  NMR spectrum of compound **3m**



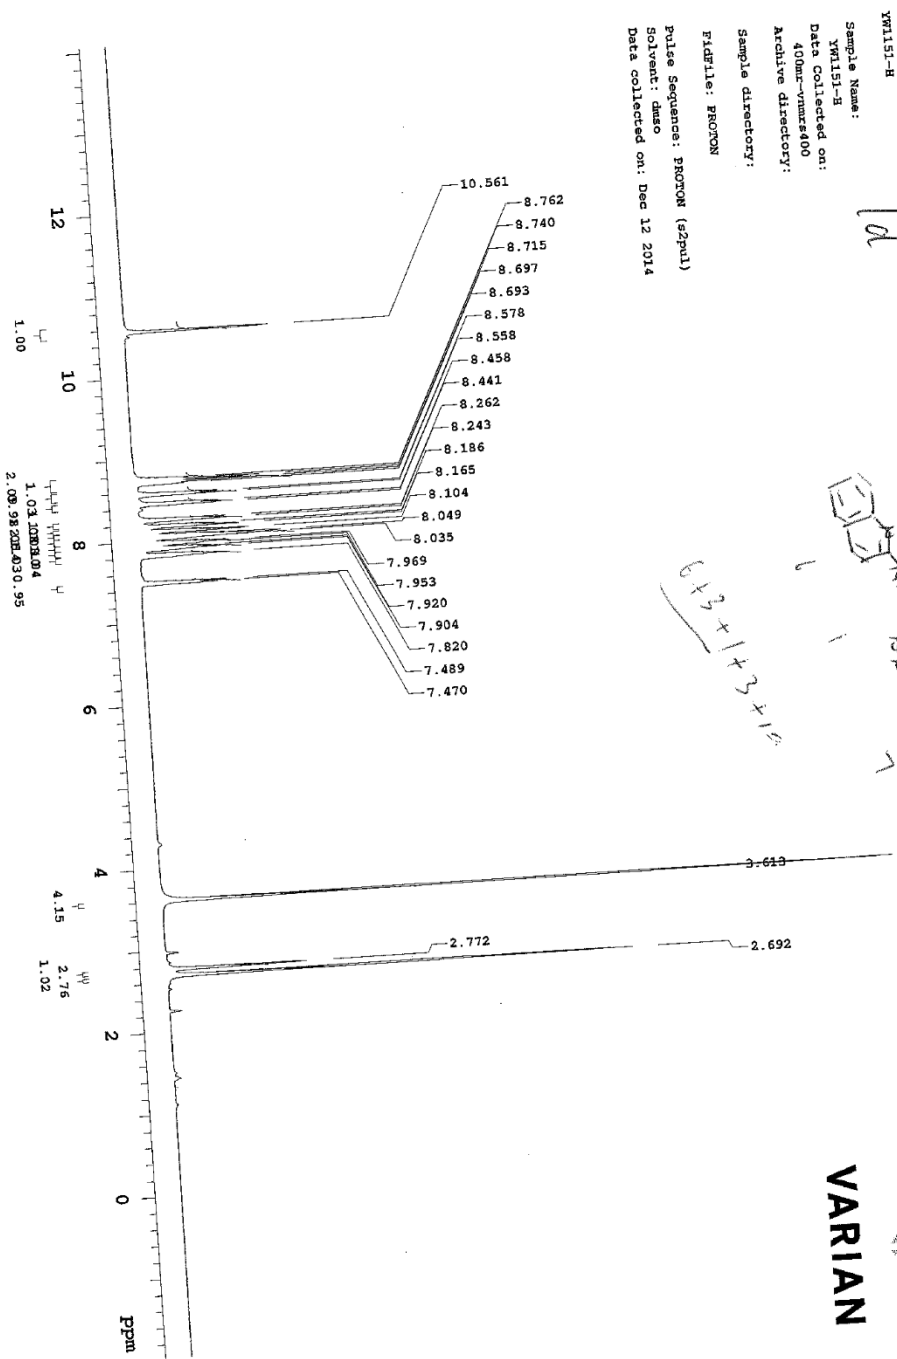

Figure S32. <sup>1</sup>H NMR spectrum of compound 3n

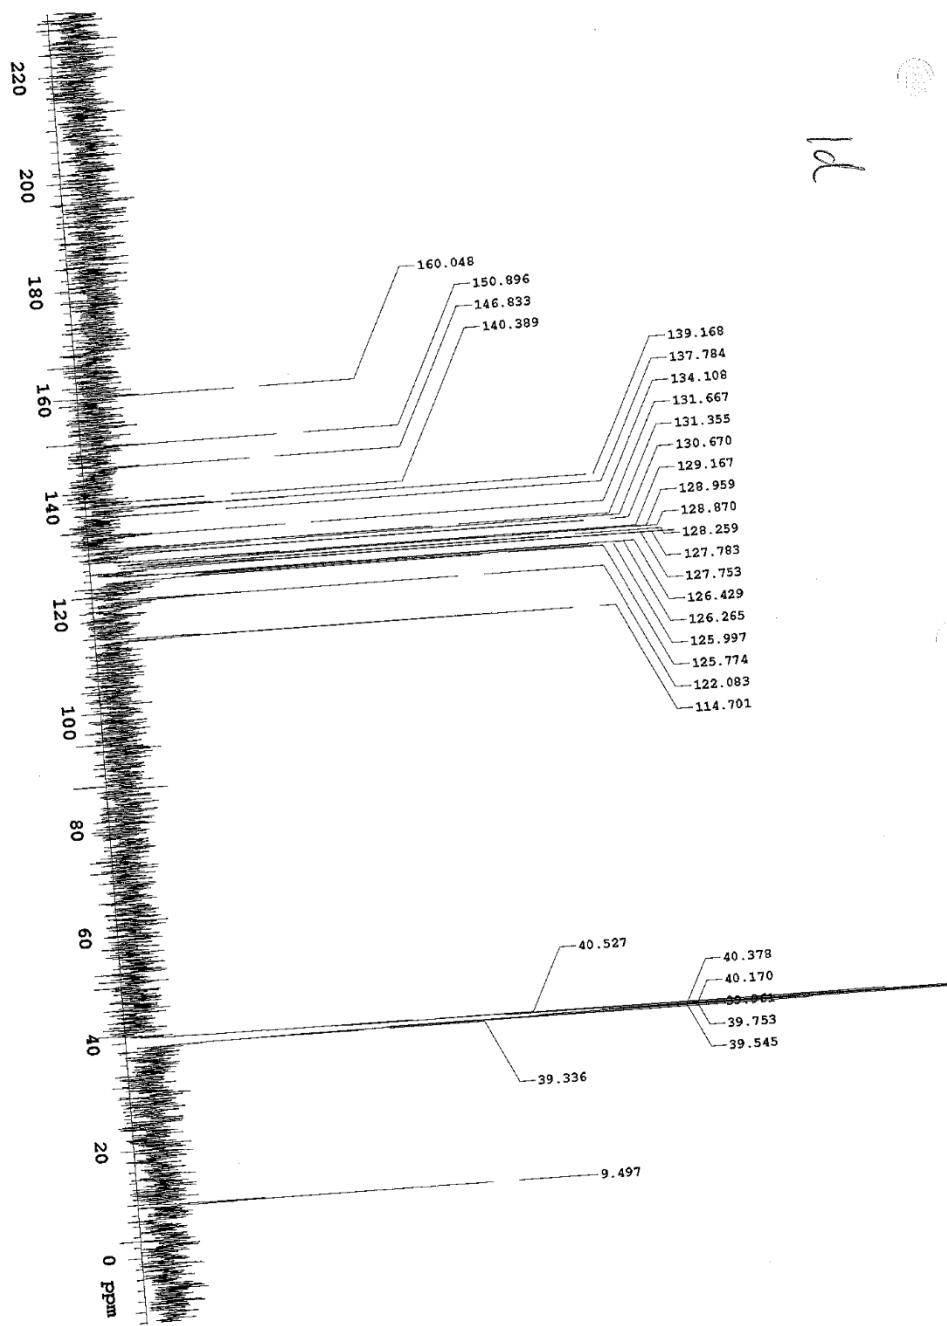

Figure S33. <sup>13</sup>C NMR spectrum of compound 3n

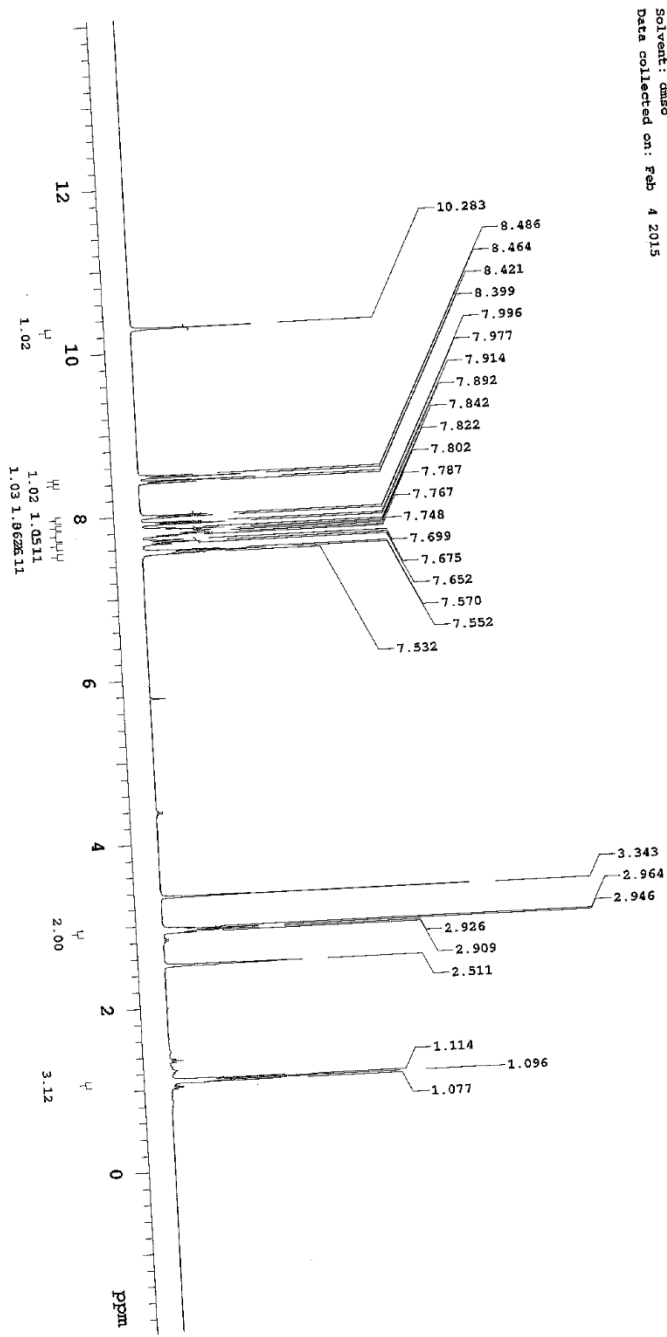

Sample Name: YW2013-B  
 Data Collected on: 4/08/2015  
 Archive directory:  
 Sample directory:  
 FID file: PROTON  
 Pulse Sequence: PROTON (zgpg3)  
 Solvent: dmso  
 Data collected on: Feb 4 2015

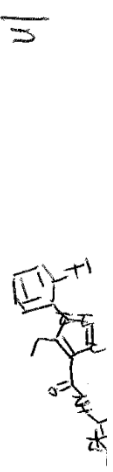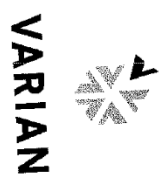

Figure S34. <sup>1</sup>H NMR spectrum of compound 30

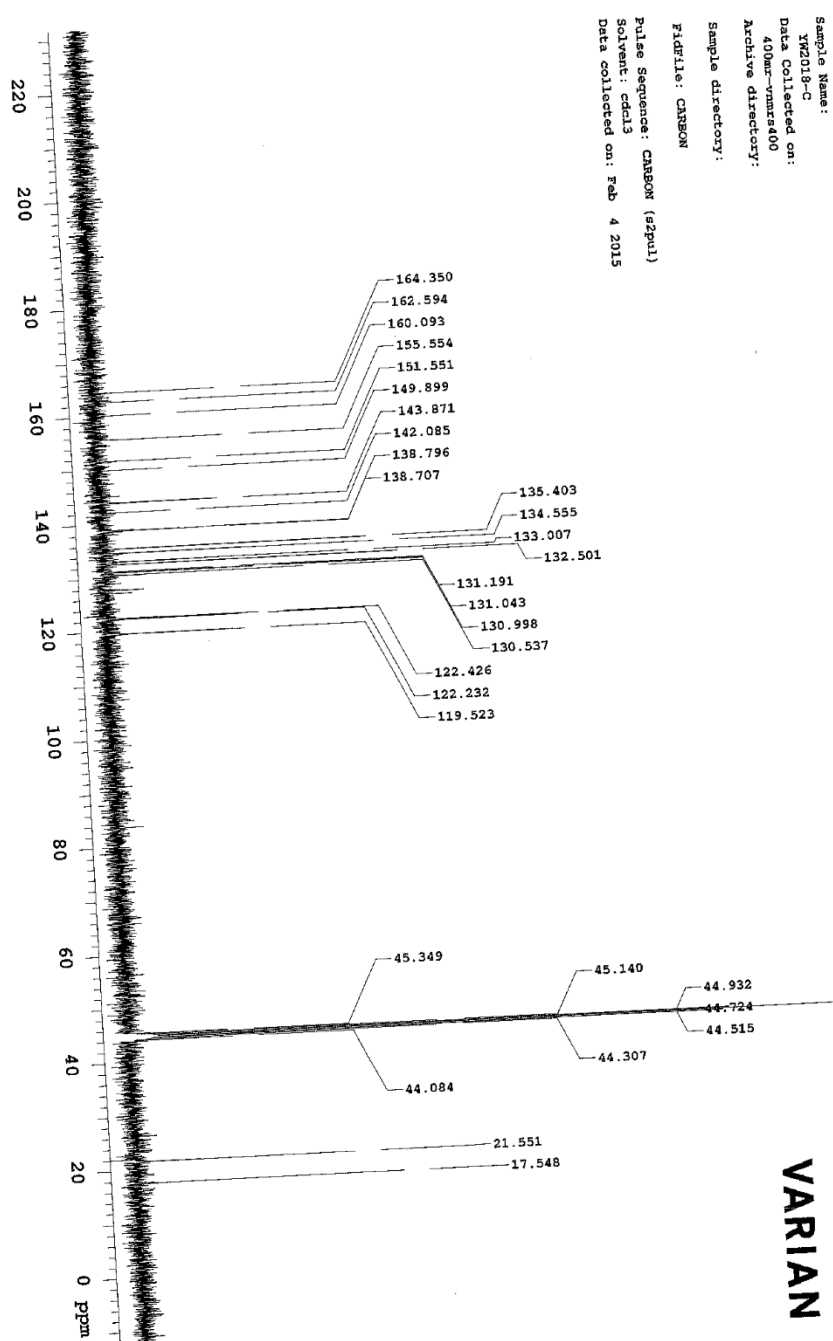

Figure S35.  $^{13}\text{C}$  NMR spectrum of compound **30**

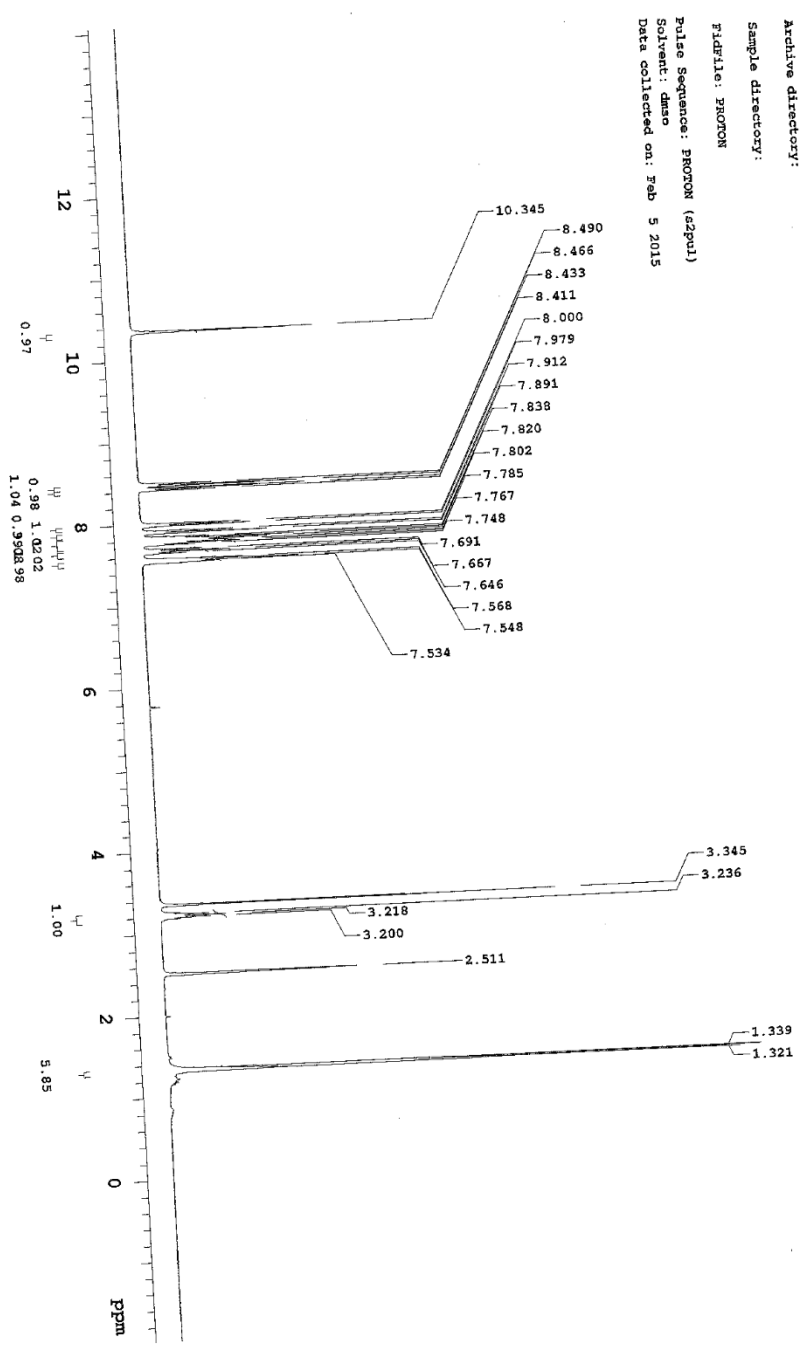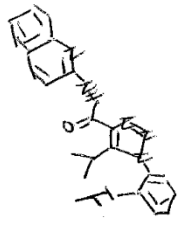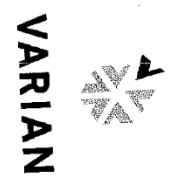

Figure S36. <sup>1</sup>H NMR spectrum of compound 3p

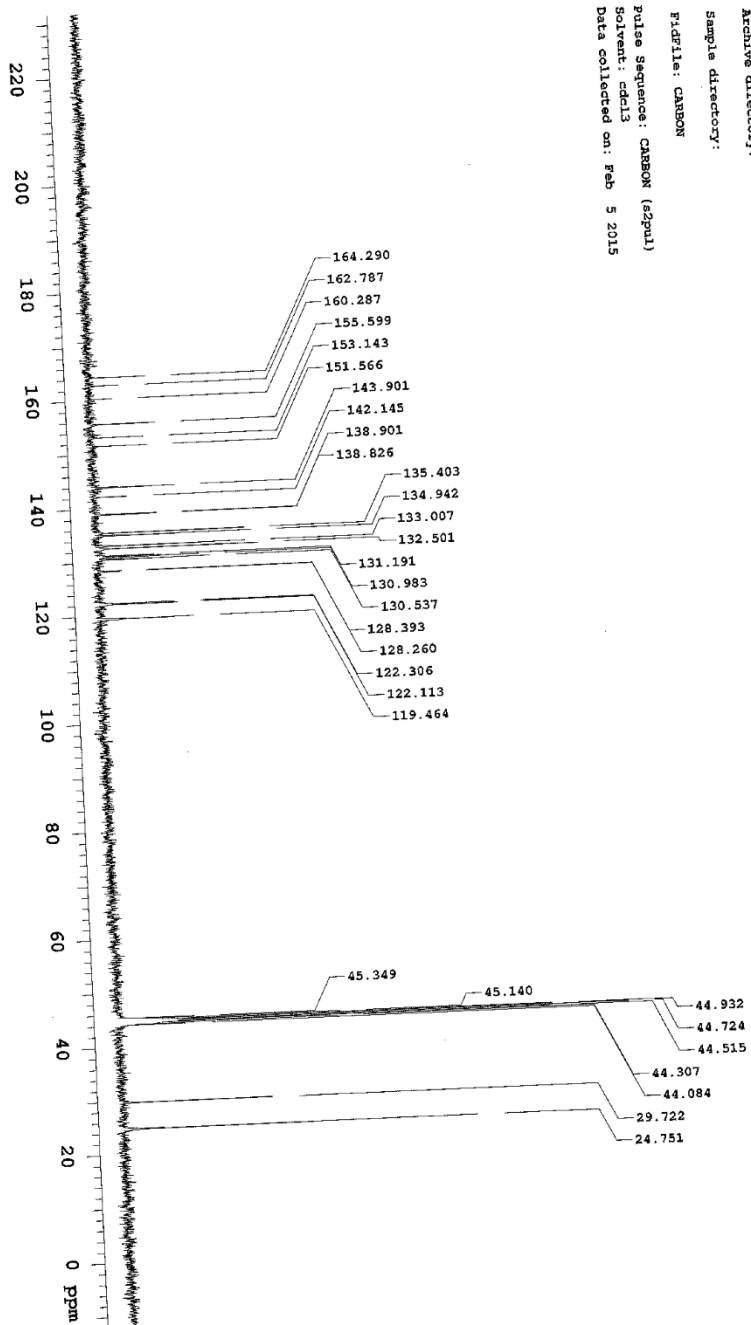

Figure S37.  $^{13}\text{C}$  NMR spectrum of compound **3p**

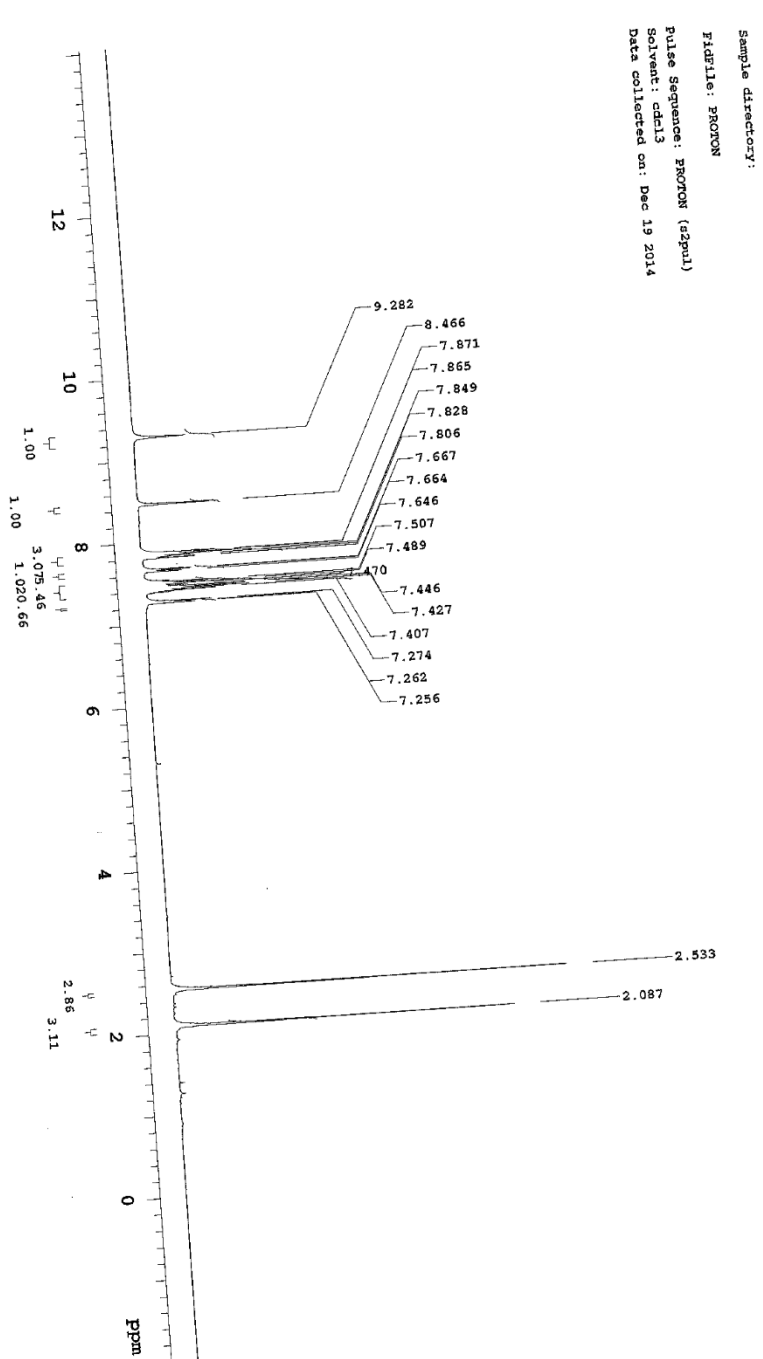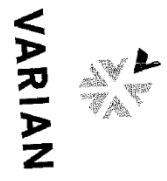

Figure S38. <sup>1</sup>H NMR spectrum of compound 3q

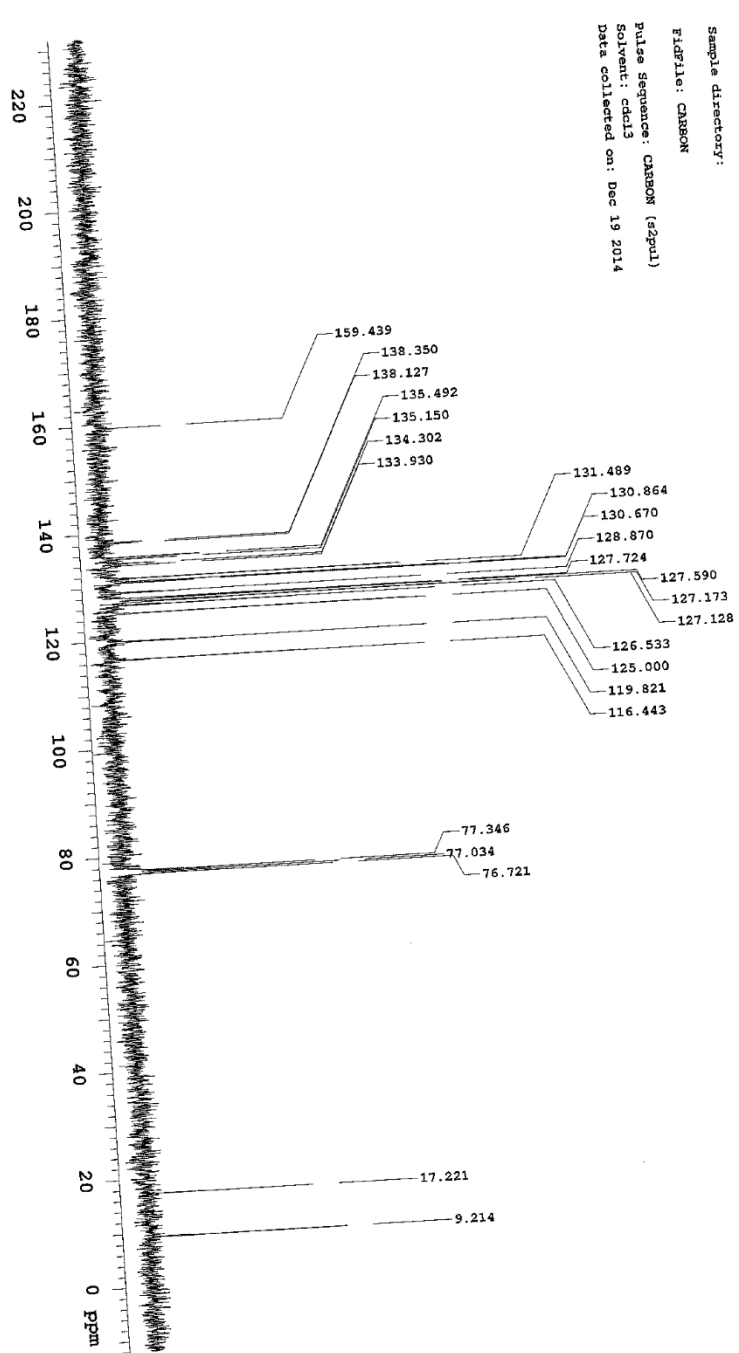

VARIAN

Figure S39.  $^{13}\text{C}$  NMR spectrum of compound **3q**



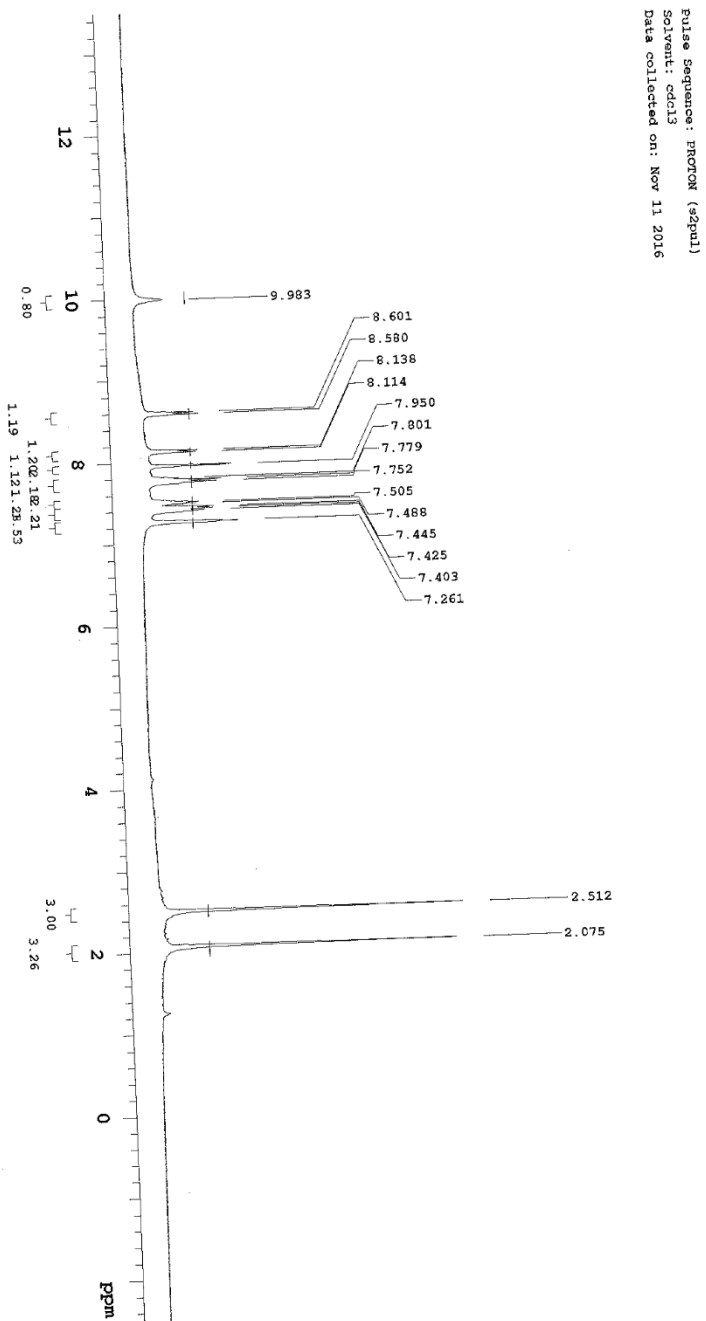

Figure S40. <sup>1</sup>H NMR spectrum of compound 3r

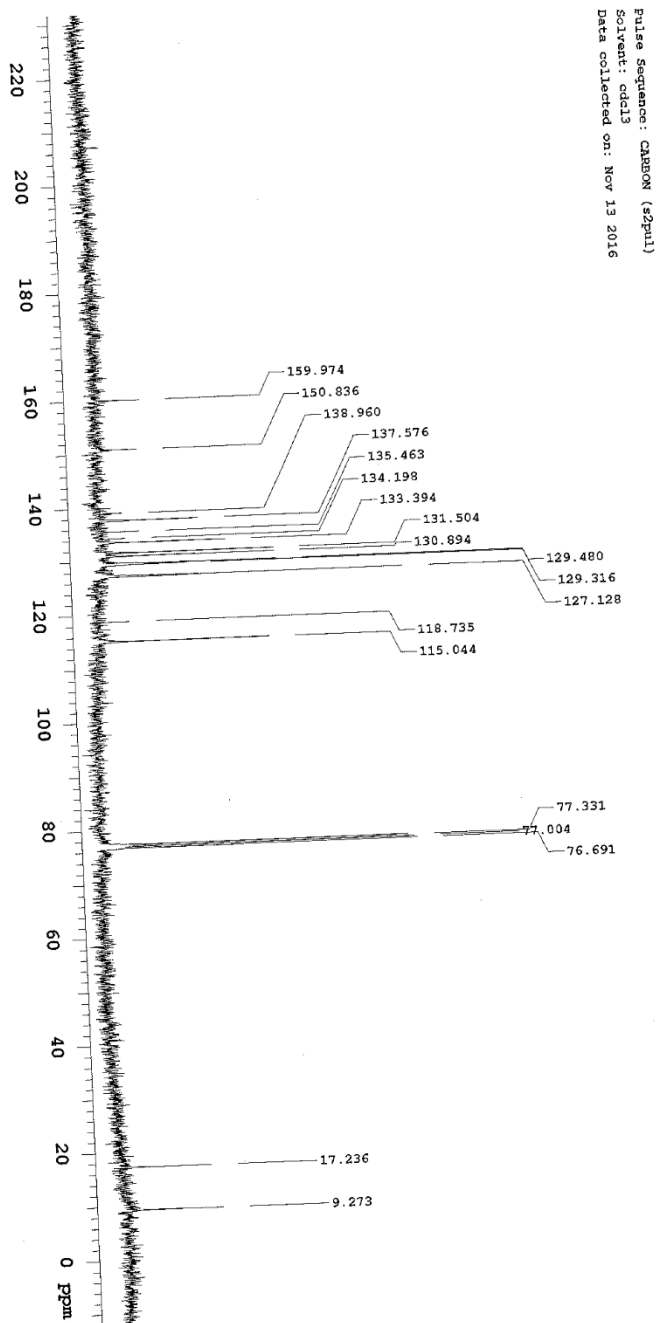

Figure S41.  $^{13}\text{C}$  NMR spectrum of compound **3r**

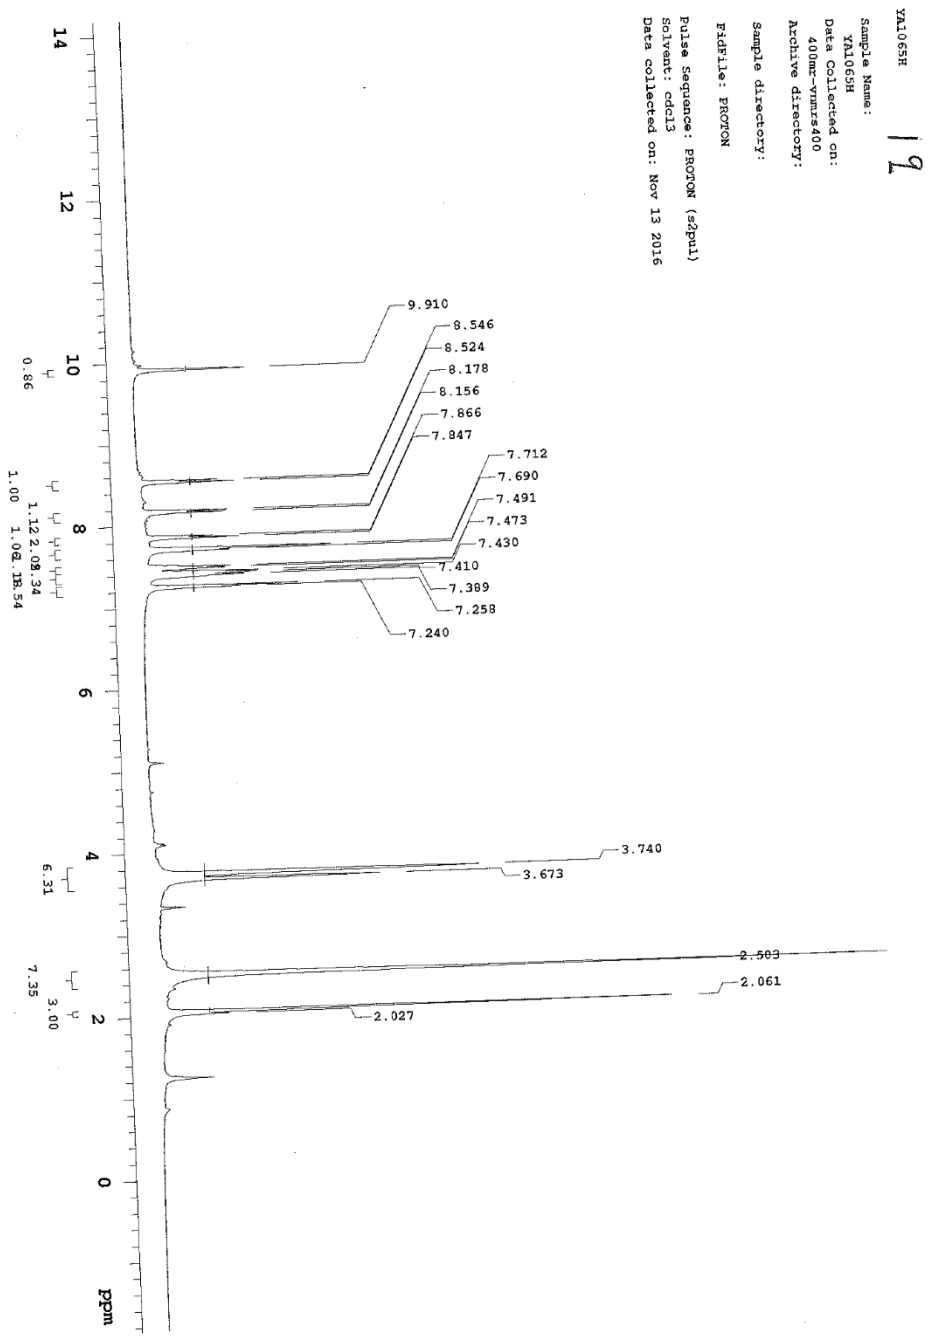

Figure S42. <sup>1</sup>H NMR spectrum of compound 3s

YAI065C

19

Sample Name:  
YAI065C  
Data collected on:  
4/06/2016  
Archive directory:  
Sample directory:  
FIDFile: CARBON  
Pulse Sequence: CARBON (a2pu1)  
Solvent: cdcl3  
Data collected on: Nov 13 2016

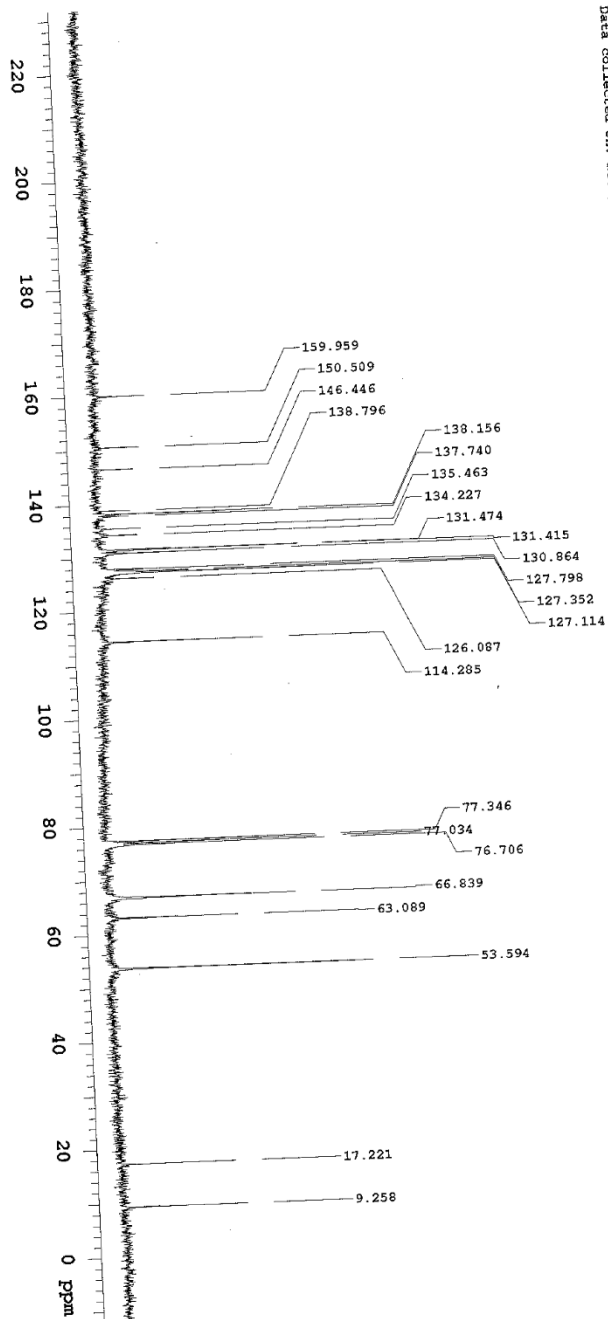

Figure S43.  $^{13}\text{C}$  NMR spectrum of compound 3s

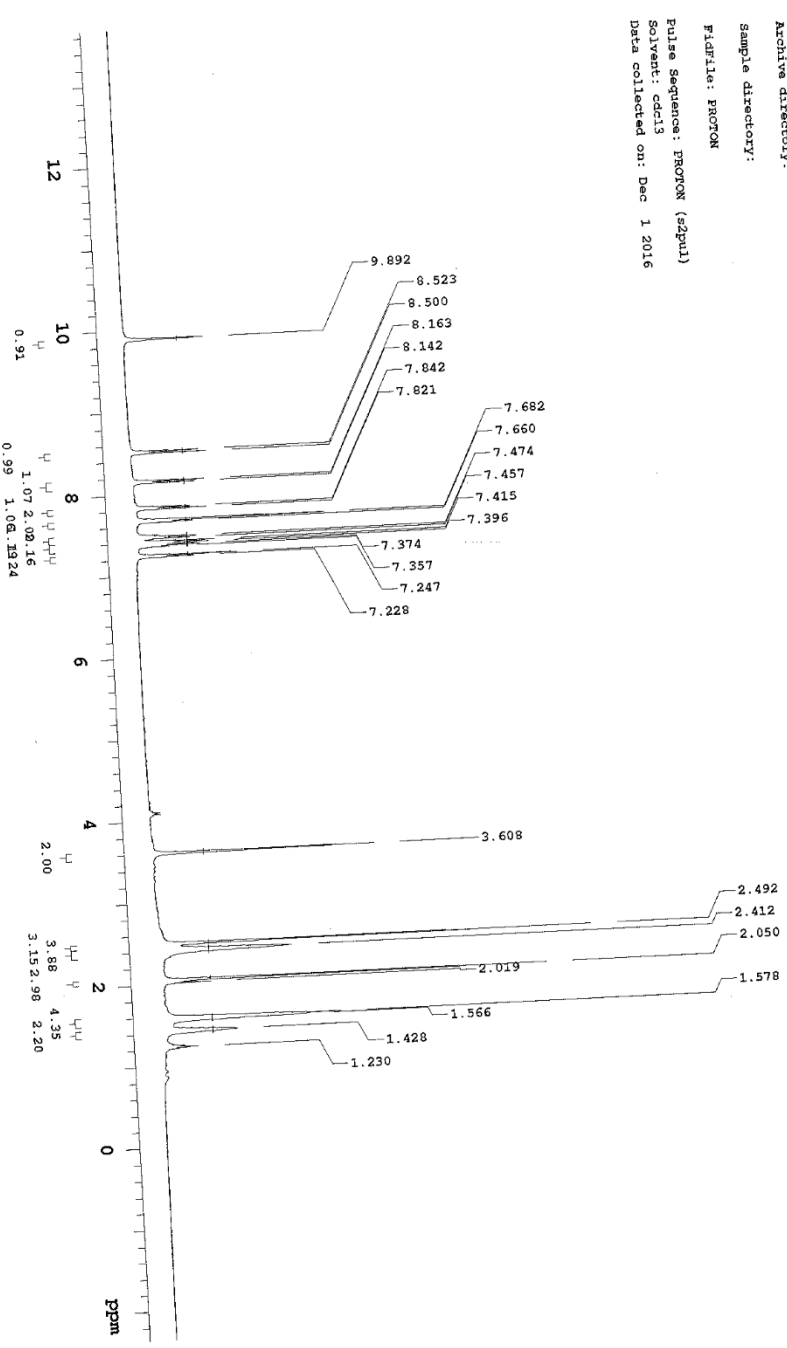

YA1093H  
 Sample Name: YA1093H  
 Data Collected on: 400MHz-mmcs400  
 Archive directory:  
 Sample directory:  
 FIDFile: PROTON  
 Pulse Sequence: PROTON (szpml)  
 Solvent: cdc13  
 Data collected on: Dec 1 2016

Figure S44. <sup>1</sup>H NMR spectrum of compound 3t

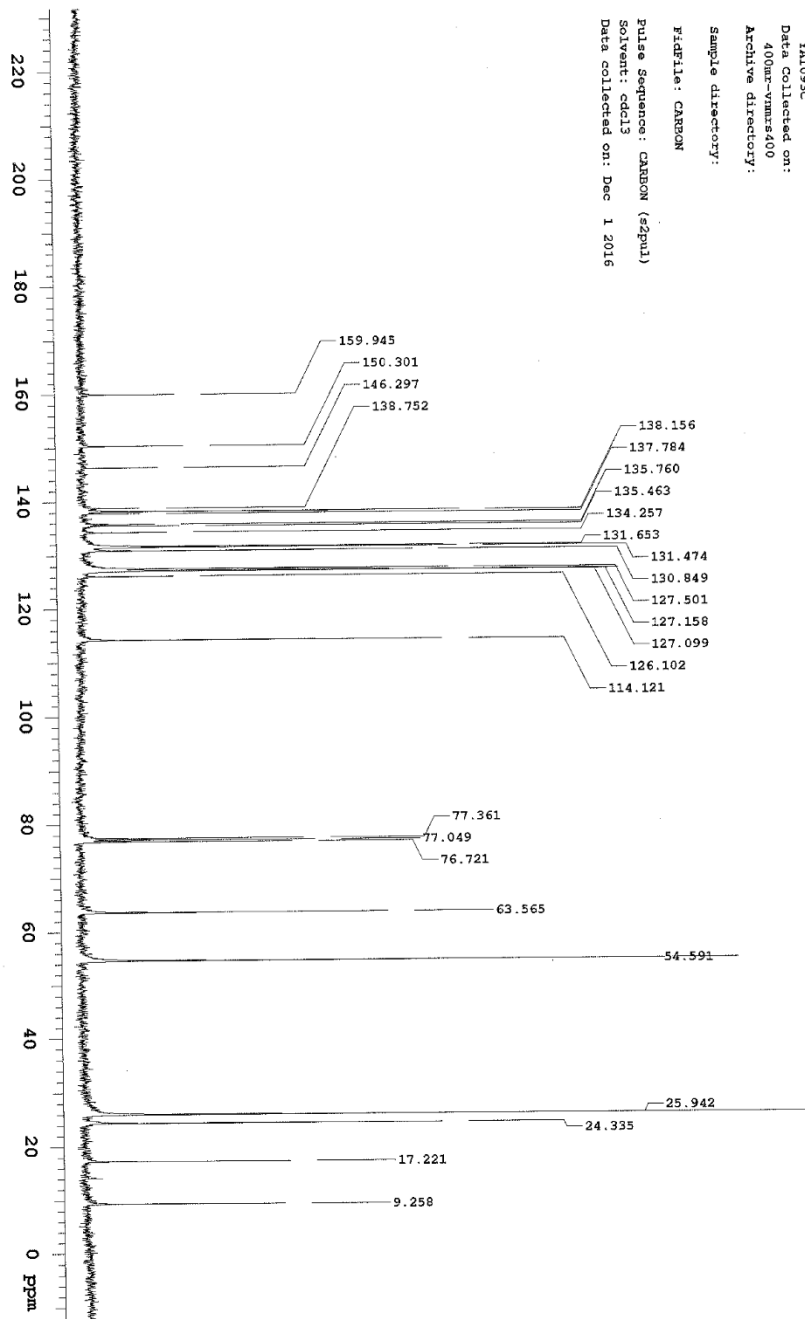

Figure S45.  $^{13}\text{C}$  NMR spectrum of compound **3t**

YAL099H  
15

Sample Name: YAL099H  
Data Collected on: 400MHz-mmz400  
Archive directory:  
Sample directory:  
FIDFile: PROTON  
Pulse Sequence: PROTON (zgpg3)  
Solvent: cdcl3  
Data collected on: Dec 1 2016

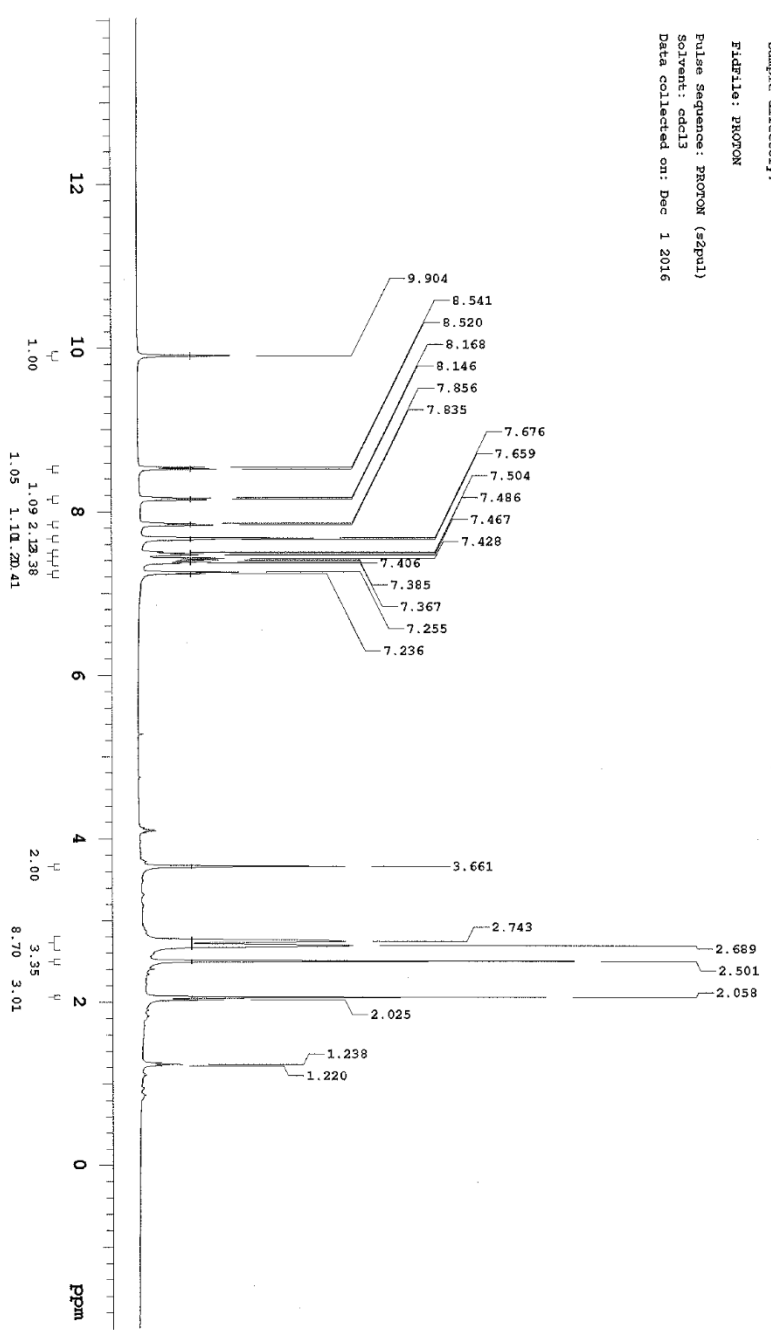

Figure S46. <sup>1</sup>H NMR spectrum of compound 3u

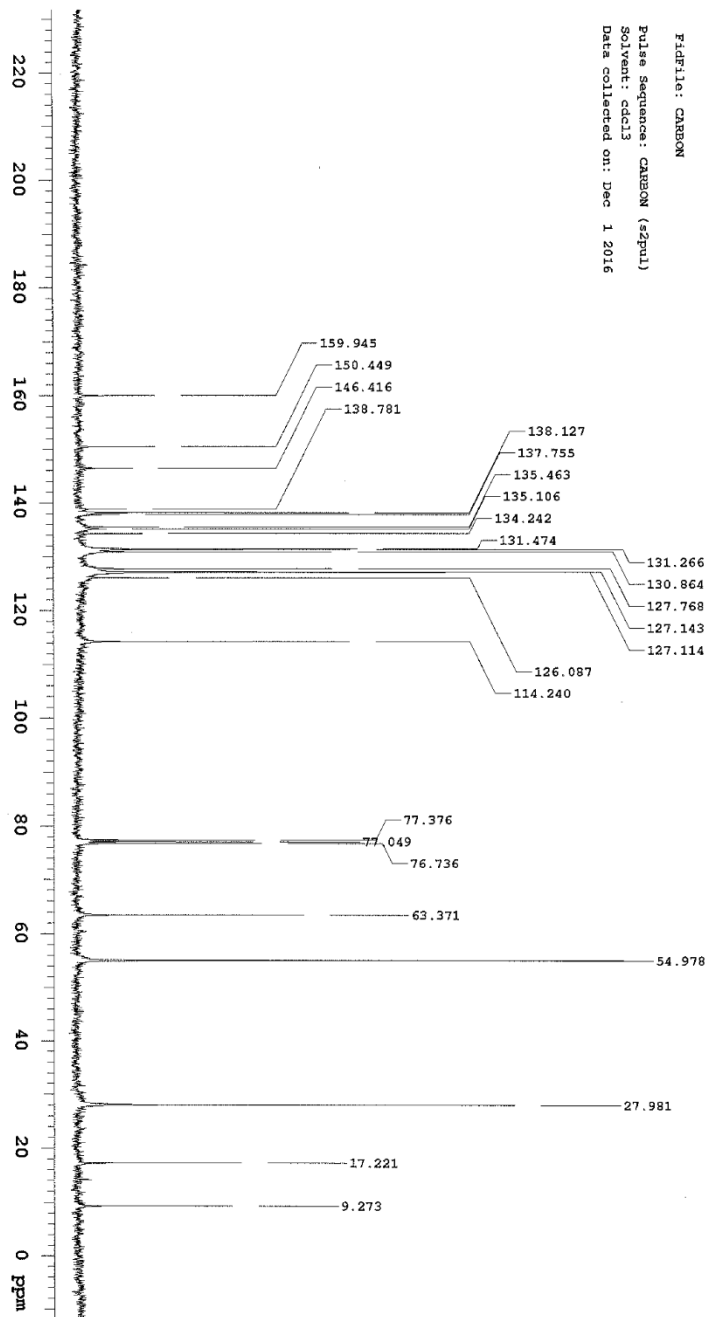

Figure S47. <sup>13</sup>C NMR spectrum of compound **3u**
